# Supplementary material for: An efficient and robust procedure to calculate absorption spectra of aqueous charged species applied to NO2−
Source: Royal Society of Chemistry journal article supplement (doi:10.1039/d1cp00652e), 2021-01-01
Supplement: d1cp00652e2.pdf [file d1cp00652e2.pdf]

## Electronic Supplementary Information (ESI)

# An efficient and robust procedure to calculate absorption spectra of aqueous charged species applied to $\text{NO}_2^-$

Lina Uribe,<sup>†</sup> Sara Gómez,<sup>‡</sup> Tommaso Giovannini,<sup>‡</sup> Franco Egidi,<sup>‡</sup>  
and Albeiro Restrepo<sup>†</sup>

<sup>†</sup>*Instituto de Química, Universidad de Antioquia UdeA, Calle 70 No. 52-21, Medellín, Colombia*

<sup>‡</sup>*Scuola Normale Superiore, Classe di Scienze, Piazza dei Cavalieri 7, 56126, Pisa, Italy*

\*Correspondence: sara.gomezmay@sns.it, albeiro.restrepo@udea.edu.co

## Contents

|          |                                                             |            |
|----------|-------------------------------------------------------------|------------|
| <b>1</b> | <b>MD simulations</b>                                       | <b>S2</b>  |
| <b>2</b> | <b>ASCEC conditions</b>                                     | <b>S3</b>  |
| <b>3</b> | <b>Radial distribution functions</b>                        | <b>S3</b>  |
| <b>4</b> | <b>Energies and isomer populations</b>                      | <b>S4</b>  |
| <b>5</b> | <b>Structural motifs</b>                                    | <b>S10</b> |
| 5.1      | $x = 1$ . . . . .                                           | S10        |
| 5.2      | $x = 2$ . . . . .                                           | S11        |
| 5.3      | $x = 3$ . . . . .                                           | S12        |
| 5.4      | $x = 4$ . . . . .                                           | S14        |
| 5.5      | $x = 5$ . . . . .                                           | S17        |
| 5.6      | $x = 6$ . . . . .                                           | S21        |
| <b>6</b> | <b>Vertical Excitation Energies in the QM/MM approaches</b> | <b>S27</b> |
| <b>7</b> | <b>CAM-B3LYP spectra</b>                                    | <b>S27</b> |

## 1 MD simulations

Table S1: Conditions for the MD simulations of the  $\text{NO}_2^-$  in aqueous solution

| Item                | Description                                                                                                                                                                                                                          |
|---------------------|--------------------------------------------------------------------------------------------------------------------------------------------------------------------------------------------------------------------------------------|
| MD package          | GROMACS 2020.3[1]                                                                                                                                                                                                                    |
| Solute charges      | CM5[2] and RESP[3]                                                                                                                                                                                                                   |
| Force field         | GAFF[4]                                                                                                                                                                                                                              |
| Water molecules     | TIP3P[5]                                                                                                                                                                                                                             |
| Energy minimization | steepest descent minimization algorithm                                                                                                                                                                                              |
| NVT equilibration   | total time: 0.2 ns<br>velocity-rescaling method[6]<br>integration time step: 0.2 fs<br>coupling constant: 0.1 ps                                                                                                                     |
| NPT equilibration   | total time: 1 ns<br>integration time step: 1 fs<br>barostat: Parrinello–Rahman[7]                                                                                                                                                    |
| NPT production      | total time: 50 ns<br>integration time step: 2 fs<br>LINCS algorithm<br>Electrostatic interactions: Particle Mesh Ewald (PME)[8]<br>grid spacing: 0.16 nm<br>cubic interpolation<br>Coulomb cut-off: 1.0 nm<br>leap-frog algorithm[9] |

## 2 ASCEC conditions

Table S2: Specific annealing conditions used in the exploration of the PES of  $[\text{NO}_2(\text{H}_2\text{O})_x]^-$  clusters with  $x = 1 - 6$ . To eliminate structural bias, all ASCEC runs used the big bang initial conditions, that is, all individual molecules were superimposed at the center of the cubic box and the system was allowed to evolve under the annealing conditions.

| Parameter          | $x$                              |      |      |      |      |      |
|--------------------|----------------------------------|------|------|------|------|------|
|                    | 1                                | 2    | 3    | 4    | 5    | 6    |
| Cube's length (Å)  | 3                                | 5    | 8    | 10   | 10   | 12   |
| Number of replicas | 2                                | 2    | 2    | 2    | 3    | 4    |
| MaxCycle           | 1000                             | 1000 | 1000 | 1000 | 3000 | 3000 |
| Quenching route    | $T_0=600$ K, %dism=10, 200 steps |      |      |      |      |      |
| Method             | B3LYP                            |      |      |      |      |      |
| Basis set          | 6-31g(d)                         |      |      |      |      |      |

## 3 Radial distribution functions

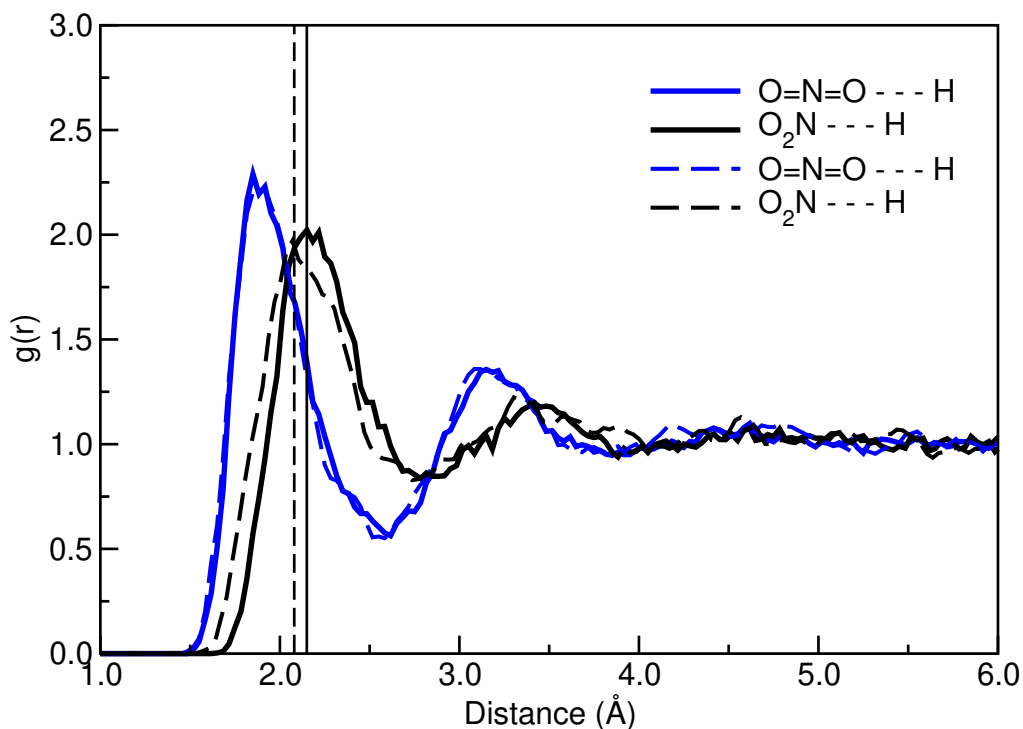

Figure S1: Radial distribution functions (RDFs) between Oxygen atoms of  $\text{NO}_2^-$  and water Hydrogen atoms, as obtained from MD with CM5 charges (solid lines) and MD with RESP charges (dashed line) runs

## 4 Energies and isomer populations

Table S3: Binding energies in kcal/mol and isomer populations ( $\% \chi_i$ ) derived from Boltzmann distributions of the isomer energies for the entire set of structures derived from ASCEC. All quantities calculated using the ZPE-corrected electronic (E), Enthalpy (H) and Gibbs (G) potential energy surfaces at room conditions.

| Structures                     | -BE   | -BE <sub>H</sub> | -BE <sub>G</sub> | $\% \chi_i$ E | $\% \chi_i$ H | $\% \chi_i$ G |
|--------------------------------|-------|------------------|------------------|---------------|---------------|---------------|
| W <sub>1</sub> S <sub>1</sub>  | 16.13 | 16.72            | 8.01             | 89.51         | 90.52         | 85.30         |
| W <sub>1</sub> S <sub>2</sub>  | 14.69 | 15.24            | 6.65             | 7.95          | 7.40          | 8.60          |
| W <sub>1</sub> S <sub>3</sub>  | 13.71 | 14.08            | 6.32             | 1.51          | 1.04          | 4.95          |
| W <sub>1</sub> S <sub>4</sub>  | 13.49 | 14.08            | 5.46             | 1.04          | 1.04          | 1.15          |
| W <sub>2</sub> S <sub>1</sub>  | 28.57 | 29.49            | 12.64            | 66.87         | 53.00         | 74.90         |
| W <sub>2</sub> S <sub>2</sub>  | 27.30 | 28.44            | 11.39            | 7.88          | 8.93          | 9.15          |
| W <sub>2</sub> S <sub>3</sub>  | 26.60 | 27.34            | 11.36            | 2.39          | 1.41          | 8.59          |
| W <sub>2</sub> S <sub>4</sub>  | 27.65 | 29.00            | 10.89            | 14.19         | 23.32         | 3.92          |
| W <sub>2</sub> S <sub>5</sub>  | 26.83 | 28.05            | 10.19            | 3.55          | 4.67          | 1.19          |
| W <sub>2</sub> S <sub>6</sub>  | 25.69 | 26.79            | 9.98             | 0.52          | 0.55          | 0.83          |
| W <sub>2</sub> S <sub>7</sub>  | 25.88 | 27.02            | 9.71             | 0.52          | 0.55          | 0.83          |
| W <sub>2</sub> S <sub>8</sub>  | 26.73 | 28.17            | 9.48             | 2.98          | 5.70          | 0.36          |
| W <sub>2</sub> S <sub>9</sub>  | 25.30 | 27.39            | 8.92             | 0.87          | 1.54          | 0.14          |
| W <sub>3</sub> S <sub>1</sub>  | 38.59 | 39.94            | 15.16            | 7.58          | 4.04          | 27.90         |
| W <sub>3</sub> S <sub>2</sub>  | 38.75 | 40.15            | 15.11            | 9.89          | 5.83          | 25.39         |
| W <sub>3</sub> S <sub>3</sub>  | 38.44 | 39.82            | 15.04            | 5.91          | 3.32          | 22.57         |
| W <sub>3</sub> S <sub>4</sub>  | 38.53 | 40.09            | 14.22            | 6.77          | 5.26          | 5.67          |
| W <sub>3</sub> S <sub>5</sub>  | 38.90 | 40.56            | 14.17            | 12.86         | 11.47         | 5.25          |
| W <sub>3</sub> S <sub>6</sub>  | 39.28 | 41.00            | 14.13            | 24.04         | 24.29         | 4.90          |
| W <sub>3</sub> S <sub>7</sub>  | 38.01 | 39.50            | 13.63            | 2.83          | 1.94          | 2.08          |
| W <sub>3</sub> S <sub>8</sub>  | 38.52 | 40.21            | 13.50            | 6.72          | 6.38          | 1.68          |
| W <sub>3</sub> S <sub>9</sub>  | 38.41 | 40.27            | 13.22            | 5.58          | 7.07          | 1.05          |
| W <sub>3</sub> S <sub>10</sub> | 36.51 | 38.15            | 13.02            | 0.23          | 0.20          | 0.74          |
| W <sub>3</sub> S <sub>11</sub> | 37.94 | 39.76            | 12.92            | 2.51          | 2.99          | 0.63          |
| W <sub>3</sub> S <sub>12</sub> | 38.05 | 40.03            | 12.62            | 3.05          | 4.75          | 0.38          |
| W <sub>3</sub> S <sub>13</sub> | 36.61 | 38.14            | 12.51            | 0.27          | 0.20          | 0.32          |
| W <sub>3</sub> S <sub>14</sub> | 37.77 | 39.72            | 12.21            | 1.90          | 2.79          | 0.19          |
| W <sub>3</sub> S <sub>15</sub> | 35.75 | 37.36            | 12.14            | 0.06          | 0.05          | 0.17          |
| W <sub>3</sub> S <sub>16</sub> | 37.41 | 39.33            | 12.03            | 1.04          | 1.46          | 0.14          |
| W <sub>3</sub> S <sub>17</sub> | 35.70 | 37.13            | 12.02            | 0.06          | 0.04          | 0.14          |
| W <sub>3</sub> S <sub>18</sub> | 36.91 | 38.82            | 11.91            | 0.44          | 0.62          | 0.12          |
| W <sub>3</sub> S <sub>19</sub> | 34.78 | 36.28            | 11.72            | 0.01          | 0.01          | 0.08          |
| W <sub>3</sub> S <sub>20</sub> | 37.61 | 39.65            | 11.71            | 1.44          | 2.48          | 0.08          |
| W <sub>3</sub> S <sub>21</sub> | 36.42 | 38.25            | 11.69            | 0.19          | 0.23          | 0.08          |
| W <sub>3</sub> S <sub>22</sub> | 37.31 | 39.30            | 11.69            | 0.87          | 1.37          | 0.08          |

|             |       |       |       |       |       |       |
|-------------|-------|-------|-------|-------|-------|-------|
| $W_3S_{23}$ | 36.63 | 38.49 | 11.68 | 0.28  | 0.35  | 0.08  |
| $W_3S_{24}$ | 38.26 | 40.54 | 11.59 | 4.32  | 11.15 | 0.07  |
| $W_3S_{25}$ | 34.87 | 36.48 | 11.54 | 0.01  | 0.01  | 0.06  |
| $W_3S_{26}$ | 37.27 | 39.25 | 11.47 | 0.81  | 1.26  | 0.06  |
| $W_3S_{27}$ | 34.61 | 36.20 | 11.45 | 0.01  | 0.01  | 0.05  |
| $W_3S_{28}$ | 36.56 | 38.44 | 11.26 | 0.25  | 0.32  | 0.04  |
| $W_3S_{29}$ | 35.03 | 36.59 | 10.47 | 0.02  | 0.01  | 0.01  |
| $W_3S_{30}$ | 35.83 | 37.77 | 10.23 | 0.07  | 0.11  | 0.01  |
| $W_4S_1$    | 48.50 | 49.96 | 17.75 | 5.49  | 1.42  | 46.46 |
| $W_4S_2$    | 48.24 | 49.75 | 17.34 | 3.54  | 0.99  | 23.44 |
| $W_4S_3$    | 48.85 | 50.91 | 16.51 | 10.02 | 7.05  | 5.76  |
| $W_4S_4$    | 48.77 | 50.88 | 16.12 | 8.66  | 6.74  | 2.97  |
| $W_4S_5$    | 46.80 | 48.50 | 16.10 | 0.31  | 0.12  | 2.91  |
| $W_4S_6$    | 48.35 | 50.41 | 16.07 | 4.29  | 3.00  | 2.77  |
| $W_4S_7$    | 48.12 | 49.90 | 16.05 | 2.89  | 1.27  | 2.67  |
| $W_4S_8$    | 48.83 | 50.99 | 15.94 | 9.56  | 8.12  | 2.22  |
| $W_4S_9$    | 48.75 | 50.91 | 15.90 | 8.45  | 6.99  | 2.05  |
| $W_4S_{10}$ | 48.11 | 50.19 | 15.83 | 2.85  | 2.09  | 1.84  |
| $W_4S_{11}$ | 48.16 | 50.25 | 15.53 | 3.11  | 2.30  | 1.10  |
| $W_4S_{12}$ | 48.23 | 50.36 | 15.44 | 3.48  | 2.79  | 0.95  |
| $W_4S_{13}$ | 48.21 | 50.32 | 15.44 | 3.37  | 2.61  | 0.95  |
| $W_4S_{14}$ | 47.14 | 49.09 | 15.27 | 0.56  | 0.33  | 0.71  |
| $W_4S_{15}$ | 47.08 | 49.27 | 15.10 | 0.50  | 0.45  | 0.54  |
| $W_4S_{16}$ | 47.31 | 49.66 | 15.10 | 0.74  | 0.85  | 0.54  |
| $W_4S_{17}$ | 47.34 | 49.33 | 14.75 | 0.77  | 0.49  | 0.29  |
| $W_4S_{18}$ | 48.55 | 50.96 | 14.65 | 6.03  | 7.66  | 0.25  |
| $W_4S_{19}$ | 47.37 | 49.48 | 14.60 | 0.82  | 0.63  | 0.23  |
| $W_4S_{20}$ | 46.76 | 48.77 | 14.53 | 0.29  | 0.19  | 0.20  |
| $W_4S_{21}$ | 46.65 | 48.62 | 14.44 | 0.24  | 0.15  | 0.18  |
| $W_4S_{22}$ | 47.82 | 49.90 | 14.37 | 1.75  | 1.27  | 0.16  |
| $W_4S_{23}$ | 46.52 | 48.51 | 14.24 | 0.20  | 0.12  | 0.13  |
| $W_4S_{24}$ | 48.87 | 50.31 | 14.17 | 1.92  | 2.58  | 0.11  |
| $W_4S_{25}$ | 46.32 | 48.30 | 14.14 | 0.14  | 0.09  | 0.11  |
| $W_4S_{26}$ | 46.31 | 48.30 | 14.13 | 0.14  | 0.09  | 0.10  |
| $W_4S_{27}$ | 47.38 | 49.87 | 13.97 | 0.83  | 1.22  | 0.08  |
| $W_4S_{28}$ | 48.25 | 50.82 | 13.91 | 3.62  | 6.05  | 0.07  |
| $W_4S_{29}$ | 48.24 | 50.76 | 13.65 | 3.53  | 5.45  | 0.05  |
| $W_4S_{30}$ | 47.43 | 49.65 | 13.58 | 0.91  | 0.85  | 0.04  |
| $W_4S_{31}$ | 48.43 | 51.32 | 13.58 | 4.93  | 14.02 | 0.04  |
| $W_4S_{32}$ | 47.50 | 49.99 | 13.34 | 1.02  | 1.49  | 0.03  |
| $W_4S_{33}$ | 45.62 | 48.03 | 13.07 | 0.04  | 0.06  | 0.02  |
| $W_4S_{34}$ | 47.42 | 50.02 | 13.04 | 0.89  | 1.57  | 0.02  |

|                                |       |       |       |      |      |       |
|--------------------------------|-------|-------|-------|------|------|-------|
| W <sub>4</sub> S <sub>35</sub> | 47.53 | 50.16 | 12.74 | 1.07 | 2.00 | 0.01  |
| W <sub>4</sub> S <sub>36</sub> | 47.44 | 50.07 | 12.71 | 0.92 | 1.70 | 0.01  |
| W <sub>4</sub> S <sub>37</sub> | 46.46 | 49.06 | 12.61 | 0.18 | 0.31 | 0.01  |
| W <sub>4</sub> S <sub>38</sub> | 45.25 | 47.56 | 12.59 | 0.02 | 0.03 | 0.01  |
| W <sub>4</sub> S <sub>39</sub> | 45.36 | 47.72 | 12.58 | 0.03 | 0.03 | 0.01  |
| W <sub>4</sub> S <sub>40</sub> | 42.67 | 44.64 | 12.32 | 0.00 | 0.00 | 0.01  |
| W <sub>4</sub> S <sub>41</sub> | 47.10 | 49.91 | 12.32 | 0.52 | 1.29 | 0.01  |
| W <sub>4</sub> S <sub>42</sub> | 47.33 | 50.10 | 12.29 | 0.77 | 1.80 | 0.01  |
| W <sub>4</sub> S <sub>43</sub> | 46.56 | 49.18 | 12.26 | 0.21 | 0.38 | 0.00  |
| W <sub>4</sub> S <sub>44</sub> | 45.70 | 48.37 | 11.48 | 0.05 | 0.10 | 0.00  |
| W <sub>4</sub> S <sub>45</sub> | 46.09 | 48.87 | 11.31 | 0.09 | 0.22 | 0.00  |
| W <sub>4</sub> S <sub>46</sub> | 45.75 | 48.41 | 11.29 | 0.05 | 0.10 | 0.00  |
| W <sub>4</sub> S <sub>47</sub> | 46.62 | 49.73 | 10.73 | 0.23 | 0.96 | 0.00  |
| W <sub>4</sub> S <sub>48</sub> | 44.31 | 46.64 | 10.58 | 0.01 | 0.01 | 0.00  |
| W <sub>5</sub> S <sub>1</sub>  | 57.05 | 58.83 | 18.92 | 0.69 | 0.04 | 34.97 |
| W <sub>5</sub> S <sub>2</sub>  | 57.20 | 59.08 | 18.90 | 0.88 | 0.05 | 33.73 |
| W <sub>5</sub> S <sub>3</sub>  | 56.87 | 58.75 | 18.41 | 0.51 | 0.03 | 14.84 |
| W <sub>5</sub> S <sub>4</sub>  | 57.53 | 59.71 | 17.86 | 1.54 | 0.16 | 5.85  |
| W <sub>5</sub> S <sub>5</sub>  | 57.94 | 60.52 | 17.32 | 3.09 | 0.62 | 2.37  |
| W <sub>5</sub> S <sub>6</sub>  | 58.19 | 60.95 | 17.07 | 4.73 | 1.28 | 1.55  |
| W <sub>5</sub> S <sub>7</sub>  | 56.78 | 59.03 | 16.95 | 0.43 | 0.05 | 1.25  |
| W <sub>5</sub> S <sub>8</sub>  | 56.07 | 58.41 | 16.91 | 0.13 | 0.02 | 1.17  |
| W <sub>5</sub> S <sub>9</sub>  | 58.36 | 61.19 | 16.66 | 6.30 | 1.90 | 0.78  |
| W <sub>5</sub> S <sub>10</sub> | 57.06 | 59.91 | 16.40 | 0.70 | 0.22 | 0.50  |
| W <sub>5</sub> S <sub>11</sub> | 58.40 | 61.38 | 16.37 | 6.72 | 2.64 | 0.47  |
| W <sub>5</sub> S <sub>12</sub> | 57.13 | 59.58 | 16.31 | 0.79 | 0.13 | 0.43  |
| W <sub>5</sub> S <sub>13</sub> | 56.26 | 58.79 | 16.03 | 0.18 | 0.03 | 0.27  |
| W <sub>5</sub> S <sub>14</sub> | 57.04 | 60.00 | 16.01 | 0.68 | 0.25 | 0.26  |
| W <sub>5</sub> S <sub>15</sub> | 55.92 | 58.44 | 15.90 | 0.10 | 0.02 | 0.22  |
| W <sub>5</sub> S <sub>16</sub> | 55.52 | 58.22 | 15.88 | 0.05 | 0.01 | 0.21  |
| W <sub>5</sub> S <sub>17</sub> | 56.86 | 59.59 | 15.57 | 0.50 | 0.13 | 0.12  |
| W <sub>5</sub> S <sub>18</sub> | 57.99 | 60.75 | 15.51 | 3.35 | 0.91 | 0.11  |
| W <sub>5</sub> S <sub>19</sub> | 56.96 | 59.75 | 15.46 | 0.59 | 0.17 | 0.10  |
| W <sub>5</sub> S <sub>20</sub> | 58.51 | 61.74 | 15.42 | 8.04 | 4.86 | 0.10  |
| W <sub>5</sub> S <sub>21</sub> | 56.98 | 59.56 | 15.35 | 0.61 | 0.12 | 0.08  |
| W <sub>5</sub> S <sub>22</sub> | 57.72 | 60.81 | 15.23 | 2.11 | 1.01 | 0.07  |
| W <sub>5</sub> S <sub>23</sub> | 57.53 | 60.59 | 15.23 | 1.55 | 0.69 | 0.07  |
| W <sub>5</sub> S <sub>24</sub> | 55.61 | 58.21 | 15.22 | 0.06 | 0.01 | 0.07  |
| W <sub>5</sub> S <sub>25</sub> | 57.53 | 60.59 | 15.02 | 1.56 | 0.70 | 0.05  |
| W <sub>5</sub> S <sub>26</sub> | 56.98 | 59.83 | 14.99 | 0.61 | 0.19 | 0.05  |
| W <sub>5</sub> S <sub>27</sub> | 56.58 | 59.21 | 14.88 | 0.31 | 0.07 | 0.04  |
| W <sub>5</sub> S <sub>28</sub> | 57.37 | 60.31 | 14.84 | 1.18 | 0.43 | 0.04  |

|             |       |       |       |       |       |       |
|-------------|-------|-------|-------|-------|-------|-------|
| $W_5S_{29}$ | 55.39 | 57.92 | 14.65 | 0.04  | 0.01  | 0.03  |
| $W_5S_{30}$ | 58.13 | 61.58 | 14.61 | 4.24  | 3.69  | 0.02  |
| $W_5S_{31}$ | 57.43 | 60.84 | 14.58 | 1.29  | 1.06  | 0.02  |
| $W_5S_{32}$ | 54.80 | 57.23 | 14.58 | 0.02  | 0.00  | 0.02  |
| $W_5S_{33}$ | 57.54 | 60.76 | 14.58 | 1.57  | 0.92  | 0.02  |
| $W_5S_{34}$ | 56.63 | 59.68 | 14.53 | 0.34  | 0.15  | 0.02  |
| $W_5S_{35}$ | 56.54 | 59.37 | 14.45 | 0.29  | 0.09  | 0.02  |
| $W_5S_{36}$ | 53.60 | 55.94 | 14.20 | 0.00  | 0.00  | 0.01  |
| $W_5S_{37}$ | 55.84 | 58.85 | 14.14 | 0.09  | 0.04  | 0.01  |
| $W_5S_{38}$ | 56.76 | 60.06 | 14.13 | 0.42  | 0.28  | 0.01  |
| $W_5S_{39}$ | 56.58 | 59.49 | 14.11 | 0.31  | 0.11  | 0.01  |
| $W_5S_{40}$ | 52.93 | 55.33 | 14.06 | 0.00  | 0.00  | 0.01  |
| $W_5S_{41}$ | 54.06 | 56.49 | 13.89 | 0.00  | 0.00  | 0.01  |
| $W_5S_{42}$ | 53.95 | 56.56 | 13.88 | 0.00  | 0.00  | 0.01  |
| $W_5S_{43}$ | 59.44 | 63.35 | 13.80 | 39.15 | 72.56 | 0.01  |
| $W_5S_{44}$ | 57.58 | 60.88 | 13.69 | 1.68  | 1.13  | 0.01  |
| $W_5S_{45}$ | 55.67 | 58.62 | 13.69 | 0.07  | 0.03  | 0.01  |
| $W_5S_{46}$ | 55.49 | 58.58 | 13.62 | 0.05  | 0.02  | 0.01  |
| $W_5S_{47}$ | 55.25 | 58.13 | 13.24 | 0.03  | 0.01  | 0.00  |
| $W_5S_{48}$ | 54.72 | 57.29 | 13.20 | 0.01  | 0.00  | 0.00  |
| $W_5S_{49}$ | 56.75 | 60.21 | 12.93 | 0.41  | 0.37  | 0.00  |
| $W_5S_{50}$ | 55.61 | 59.00 | 12.92 | 0.06  | 0.05  | 0.00  |
| $W_5S_{51}$ | 55.75 | 59.14 | 12.88 | 0.08  | 0.06  | 0.00  |
| $W_5S_{52}$ | 55.45 | 58.55 | 12.85 | 0.05  | 0.02  | 0.00  |
| $W_5S_{53}$ | 56.35 | 59.82 | 12.75 | 0.21  | 0.19  | 0.00  |
| $W_5S_{54}$ | 53.95 | 56.86 | 12.40 | 0.00  | 0.00  | 0.00  |
| $W_5S_{55}$ | 55.98 | 59.53 | 12.28 | 0.11  | 0.12  | 0.00  |
| $W_5S_{56}$ | 54.45 | 57.57 | 12.25 | 0.01  | 0.00  | 0.00  |
| $W_5S_{57}$ | 57.41 | 61.25 | 12.21 | 1.26  | 2.13  | 0.00  |
| $W_5S_{58}$ | 56.06 | 59.64 | 12.01 | 0.13  | 0.14  | 0.00  |
| $W_5S_{59}$ | 54.90 | 58.05 | 11.87 | 0.02  | 0.01  | 0.00  |
| $W_5S_{60}$ | 54.99 | 58.41 | 11.80 | 0.02  | 0.02  | 0.00  |
| $W_5S_{61}$ | 55.06 | 58.67 | 11.67 | 0.02  | 0.03  | 0.00  |
| $W_5S_{62}$ | 53.18 | 56.28 | 11.03 | 0.00  | 0.00  | 0.00  |
| $W_5S_{63}$ | 53.12 | 56.09 | 10.97 | 0.00  | 0.00  | 0.00  |
| $W_5S_{64}$ | 54.90 | 58.61 | 10.78 | 0.02  | 0.02  | 0.00  |
| $W_5S_{65}$ | 53.43 | 57.11 | 9.13  | 0.00  | 0.00  | 0.00  |
| $W_5S_{66}$ | 52.49 | 56.23 | 8.87  | 0.00  | 0.00  | 0.00  |
| $W_5S_{67}$ | 49.09 | 52.28 | 8.34  | 0.00  | 0.00  | 0.00  |
| $W_5S_{68}$ | 51.35 | 54.54 | 8.18  | 0.00  | 0.00  | 0.00  |
| $W_6S_1$    | 65.30 | 67.33 | 20.28 | 0.12  | 0.00  | 56.99 |
| $W_6S_2$    | 65.15 | 67.33 | 19.38 | 0.10  | 0.00  | 12.49 |

|                                |       |       |       |      |      |       |
|--------------------------------|-------|-------|-------|------|------|-------|
| W <sub>6</sub> S <sub>3</sub>  | 64.65 | 67.30 | 19.37 | 0.04 | 0.00 | 12.26 |
| W <sub>6</sub> S <sub>4</sub>  | 64.47 | 66.63 | 18.87 | 0.03 | 0.00 | 5.27  |
| W <sub>6</sub> S <sub>5</sub>  | 64.95 | 67.52 | 18.71 | 0.07 | 0.00 | 4.08  |
| W <sub>6</sub> S <sub>6</sub>  | 65.61 | 68.55 | 18.47 | 0.21 | 0.02 | 2.68  |
| W <sub>6</sub> S <sub>7</sub>  | 64.42 | 66.81 | 18.43 | 0.03 | 0.00 | 2.51  |
| W <sub>6</sub> S <sub>8</sub>  | 67.00 | 68.66 | 17.97 | 0.41 | 0.02 | 1.17  |
| W <sub>6</sub> S <sub>9</sub>  | 64.89 | 67.44 | 17.39 | 0.06 | 0.00 | 0.44  |
| W <sub>6</sub> S <sub>10</sub> | 66.40 | 69.70 | 16.92 | 0.79 | 0.11 | 0.21  |
| W <sub>6</sub> S <sub>11</sub> | 67.05 | 70.41 | 16.96 | 2.41 | 0.36 | 0.21  |
| W <sub>6</sub> S <sub>12</sub> | 63.84 | 66.62 | 16.88 | 0.01 | 0.00 | 0.18  |
| W <sub>6</sub> S <sub>13</sub> | 66.54 | 69.66 | 16.86 | 1.01 | 0.10 | 0.18  |
| W <sub>6</sub> S <sub>14</sub> | 65.54 | 68.57 | 16.77 | 0.19 | 0.02 | 0.15  |
| W <sub>6</sub> S <sub>15</sub> | 66.07 | 69.39 | 16.70 | 0.46 | 0.06 | 0.14  |
| W <sub>6</sub> S <sub>16</sub> | 64.17 | 67.19 | 16.41 | 0.02 | 0.00 | 0.08  |
| W <sub>6</sub> S <sub>17</sub> | 64.55 | 67.35 | 16.38 | 0.04 | 0.00 | 0.08  |
| W <sub>6</sub> S <sub>18</sub> | 66.51 | 69.80 | 16.38 | 0.96 | 0.13 | 0.08  |
| W <sub>6</sub> S <sub>19</sub> | 64.23 | 66.98 | 16.34 | 0.02 | 0.00 | 0.08  |
| W <sub>6</sub> S <sub>20</sub> | 64.76 | 67.76 | 16.3  | 0.05 | 0.00 | 0.07  |
| W <sub>6</sub> S <sub>21</sub> | 65.64 | 68.64 | 16.30 | 0.22 | 0.02 | 0.07  |
| W <sub>6</sub> S <sub>22</sub> | 65.89 | 69.17 | 16.23 | 0.34 | 0.04 | 0.06  |
| W <sub>6</sub> S <sub>23</sub> | 64.18 | 66.79 | 16.20 | 0.02 | 0.00 | 0.06  |
| W <sub>6</sub> S <sub>24</sub> | 65.69 | 68.78 | 16.12 | 0.24 | 0.02 | 0.05  |
| W <sub>6</sub> S <sub>25</sub> | 62.97 | 65.71 | 16.07 | 0.00 | 0.00 | 0.05  |
| W <sub>6</sub> S <sub>26</sub> | 64.00 | 67.06 | 15.93 | 0.01 | 0.00 | 0.04  |
| W <sub>6</sub> S <sub>27</sub> | 63.39 | 66.32 | 15.69 | 0.01 | 0.00 | 0.03  |
| W <sub>6</sub> S <sub>28</sub> | 63.51 | 66.48 | 15.68 | 0.01 | 0.00 | 0.02  |
| W <sub>6</sub> S <sub>29</sub> | 65.01 | 68.15 | 15.67 | 0.08 | 0.01 | 0.02  |
| W <sub>6</sub> S <sub>30</sub> | 63.74 | 67.12 | 15.58 | 0.01 | 0.00 | 0.02  |
| W <sub>6</sub> S <sub>31</sub> | 64.98 | 68.14 | 15.50 | 0.07 | 0.01 | 0.02  |
| W <sub>6</sub> S <sub>32</sub> | 65.97 | 69.45 | 15.49 | 0.39 | 0.07 | 0.02  |
| W <sub>6</sub> S <sub>33</sub> | 64.71 | 67.76 | 15.41 | 0.05 | 0.00 | 0.02  |
| W <sub>6</sub> S <sub>34</sub> | 62.70 | 65.29 | 15.39 | 0.00 | 0.00 | 0.02  |
| W <sub>6</sub> S <sub>35</sub> | 65.59 | 68.94 | 15.31 | 0.21 | 0.03 | 0.01  |
| W <sub>6</sub> S <sub>36</sub> | 66.22 | 69.63 | 15.28 | 0.59 | 0.10 | 0.01  |
| W <sub>6</sub> S <sub>37</sub> | 62.46 | 65.66 | 15.21 | 0.00 | 0.00 | 0.01  |
| W <sub>6</sub> S <sub>38</sub> | 64.63 | 67.54 | 15.17 | 0.04 | 0.00 | 0.01  |
| W <sub>6</sub> S <sub>39</sub> | 66.81 | 70.72 | 15.14 | 1.61 | 0.6  | 0.01  |
| W <sub>6</sub> S <sub>40</sub> | 65.98 | 69.46 | 15.10 | 0.39 | 0.07 | 0.01  |
| W <sub>6</sub> S <sub>41</sub> | 63.90 | 67.07 | 15.07 | 0.01 | 0.00 | 0.01  |
| W <sub>6</sub> S <sub>42</sub> | 64.92 | 68.24 | 15.07 | 0.07 | 0.01 | 0.01  |
| W <sub>6</sub> S <sub>43</sub> | 66.24 | 70.16 | 15.07 | 0.61 | 0.23 | 0.01  |
| W <sub>6</sub> S <sub>44</sub> | 63.37 | 66.21 | 14.93 | 0.01 | 0.00 | 0.01  |



|                                |       |       |       |       |       |      |
|--------------------------------|-------|-------|-------|-------|-------|------|
| W <sub>6</sub> S <sub>45</sub> | 64.54 | 68.07 | 14.90 | 0.04  | 0.01  | 0.01 |
| W <sub>6</sub> S <sub>46</sub> | 62.45 | 65.29 | 14.90 | 0.00  | 0.00  | 0.01 |
| W <sub>6</sub> S <sub>47</sub> | 66.19 | 69.78 | 14.88 | 0.56  | 0.12  | 0.01 |
| W <sub>6</sub> S <sub>48</sub> | 65.99 | 69.64 | 14.87 | 0.40  | 0.10  | 0.01 |
| W <sub>6</sub> S <sub>49</sub> | 65.53 | 69.32 | 14.65 | 0.18  | 0.06  | 0.00 |
| W <sub>6</sub> S <sub>50</sub> | 69.12 | 73.70 | 14.65 | 78.73 | 90.76 | 0.00 |
| W <sub>6</sub> S <sub>51</sub> | 64.30 | 67.68 | 14.63 | 0.03  | 0.00  | 0.00 |
| W <sub>6</sub> S <sub>52</sub> | 62.62 | 65.62 | 14.57 | 0.00  | 0.00  | 0.00 |
| W <sub>6</sub> S <sub>53</sub> | 62.94 | 66.13 | 14.51 | 0.00  | 0.00  | 0.00 |
| W <sub>6</sub> S <sub>54</sub> | 63.31 | 66.81 | 14.41 | 0.00  | 0.00  | 0.00 |
| W <sub>6</sub> S <sub>55</sub> | 66.81 | 70.88 | 14.41 | 1.61  | 0.78  | 0.00 |
| W <sub>6</sub> S <sub>56</sub> | 64.95 | 68.52 | 14.23 | 0.07  | 0.02  | 0.00 |
| W <sub>6</sub> S <sub>57</sub> | 64.86 | 68.30 | 14.15 | 0.06  | 0.01  | 0.00 |
| W <sub>6</sub> S <sub>58</sub> | 64.61 | 68.17 | 14.05 | 0.04  | 0.01  | 0.00 |
| W <sub>6</sub> S <sub>59</sub> | 65.92 | 70.01 | 14.04 | 0.36  | 0.18  | 0.00 |
| W <sub>6</sub> S <sub>60</sub> | 64.89 | 68.33 | 13.96 | 0.06  | 0.01  | 0.00 |
| W <sub>6</sub> S <sub>61</sub> | 62.98 | 66.11 | 13.93 | 0.00  | 0.00  | 0.00 |
| W <sub>6</sub> S <sub>62</sub> | 66.52 | 70.99 | 13.85 | 0.99  | 0.95  | 0.00 |
| W <sub>6</sub> S <sub>63</sub> | 65.05 | 68.88 | 13.84 | 0.08  | 0.03  | 0.00 |
| W <sub>6</sub> S <sub>64</sub> | 65.67 | 69.60 | 13.71 | 0.23  | 0.09  | 0.00 |
| W <sub>6</sub> S <sub>65</sub> | 64.52 | 68.06 | 13.68 | 0.03  | 0.06  | 0.00 |
| W <sub>6</sub> S <sub>66</sub> | 63.87 | 67.34 | 13.60 | 0.01  | 0.00  | 0.00 |
| W <sub>6</sub> S <sub>67</sub> | 64.16 | 68.02 | 13.57 | 0.02  | 0.00  | 0.00 |
| W <sub>6</sub> S <sub>68</sub> | 59.88 | 62.57 | 13.33 | 0.00  | 0.00  | 0.00 |
| W <sub>6</sub> S <sub>69</sub> | 62.23 | 65.49 | 13.27 | 0.00  | 0.00  | 0.00 |
| W <sub>6</sub> S <sub>70</sub> | 63.35 | 66.82 | 13.26 | 0.00  | 0.00  | 0.00 |
| W <sub>6</sub> S <sub>71</sub> | 65.39 | 69.52 | 13.25 | 0.14  | 0.08  | 0.00 |
| W <sub>6</sub> S <sub>72</sub> | 66.43 | 70.91 | 13.20 | 0.83  | 0.82  | 0.00 |
| W <sub>6</sub> S <sub>73</sub> | 65.12 | 69.08 | 13.17 | 0.09  | 0.04  | 0.00 |
| W <sub>6</sub> S <sub>74</sub> | 64.77 | 68.49 | 13.14 | 0.05  | 0.01  | 0.00 |
| W <sub>6</sub> S <sub>75</sub> | 63.82 | 67.49 | 13.07 | 0.01  | 0.00  | 0.00 |
| W <sub>6</sub> S <sub>76</sub> | 63.30 | 66.82 | 13.06 | 0.00  | 0.00  | 0.00 |
| W <sub>6</sub> S <sub>77</sub> | 61.51 | 64.47 | 13.03 | 0.00  | 0.00  | 0.00 |
| W <sub>6</sub> S <sub>78</sub> | 63.25 | 67.00 | 12.99 | 0.00  | 0.00  | 0.00 |
| W <sub>6</sub> S <sub>79</sub> | 64.89 | 69.00 | 12.95 | 0.06  | 0.03  | 0.00 |
| W <sub>6</sub> S <sub>80</sub> | 63.79 | 67.52 | 12.92 | 0.01  | 0.00  | 0.00 |
| W <sub>6</sub> S <sub>81</sub> | 65.37 | 69.39 | 12.83 | 0.14  | 0.06  | 0.00 |
| W <sub>6</sub> S <sub>82</sub> | 60.71 | 63.34 | 12.83 | 0.00  | 0.00  | 0.00 |
| W <sub>6</sub> S <sub>83</sub> | 64.26 | 68.09 | 12.74 | 0.02  | 0.01  | 0.00 |
| W <sub>6</sub> S <sub>84</sub> | 63.07 | 66.62 | 12.69 | 0.00  | 0.00  | 0.00 |
| W <sub>6</sub> S <sub>85</sub> | 65.53 | 69.57 | 12.62 | 0.18  | 0.09  | 0.00 |
| W <sub>6</sub> S <sub>86</sub> | 64.83 | 68.68 | 12.62 | 0.06  | 0.02  | 0.00 |

|                                 |        |       |       |      |      |      |
|---------------------------------|--------|-------|-------|------|------|------|
| W <sub>6</sub> S <sub>87</sub>  | 64.16  | 68.20 | 12.44 | 0.02 | 0.01 | 0.00 |
| W <sub>6</sub> S <sub>88</sub>  | 66.70  | 71.26 | 12.34 | 1.33 | 1.49 | 0.00 |
| W <sub>6</sub> S <sub>89</sub>  | 66.43  | 71.22 | 12.14 | 0.84 | 1.40 | 0.00 |
| W <sub>6</sub> S <sub>90</sub>  | 63.80  | 67.51 | 12.13 | 0.01 | 0.00 | 0.00 |
| W <sub>6</sub> S <sub>91</sub>  | 64.10  | 68.09 | 12.06 | 0.02 | 0.00 | 0.00 |
| W <sub>6</sub> S <sub>92</sub>  | 64.44  | 68.62 | 12.01 | 0.03 | 0.02 | 0.00 |
| W <sub>6</sub> S <sub>93</sub>  | 65.73  | 70.03 | 11.93 | 0.26 | 0.19 | 0.00 |
| W <sub>6</sub> S <sub>94</sub>  | 62.79  | 66.61 | 11.58 | 0.00 | 0.00 | 0.00 |
| W <sub>6</sub> S <sub>95</sub>  | 63.55  | 67.47 | 11.54 | 0.01 | 0.00 | 0.00 |
| W <sub>6</sub> S <sub>96</sub>  | 60.90  | 64.91 | 11.46 | 0.00 | 0.00 | 0.00 |
| W <sub>6</sub> S <sub>97</sub>  | 62.23  | 65.84 | 11.40 | 0.00 | 0.00 | 0.00 |
| W <sub>6</sub> S <sub>98</sub>  | 61.68  | 65.47 | 11.39 | 0.00 | 0.00 | 0.00 |
| W <sub>6</sub> S <sub>99</sub>  | 61.981 | 65.55 | 11.30 | 0.00 | 0.00 | 0.00 |
| W <sub>6</sub> S <sub>100</sub> | 60.34  | 64.05 | 11.07 | 0.00 | 0.00 | 1.02 |
| W <sub>6</sub> S <sub>101</sub> | 65.56  | 70.12 | 11.00 | 0.19 | 0.22 | 0.00 |
| W <sub>6</sub> S <sub>102</sub> | 65.47  | 70.37 | 10.77 | 0.17 | 0.33 | 0.00 |
| W <sub>6</sub> S <sub>103</sub> | 60.54  | 64.28 | 10.26 | 0.00 | 0.00 | 0.00 |
| W <sub>6</sub> S <sub>104</sub> | 62.84  | 67.12 | 9.96  | 0.00 | 0.00 | 0.00 |
| W <sub>6</sub> S <sub>105</sub> | 62.22  | 66.45 | 9.90  | 0.00 | 0.00 | 0.00 |
| W <sub>6</sub> S <sub>106</sub> | 59.36  | 62.83 | 9.49  | 0.00 | 0.00 | 0.00 |
| W <sub>6</sub> S <sub>107</sub> | 61.69  | 65.71 | 9.23  | 0.00 | 0.00 | 0.00 |
| W <sub>6</sub> S <sub>108</sub> | 58.12  | 61.86 | 8.20  | 0.00 | 0.00 | 0.00 |
| W <sub>6</sub> S <sub>109</sub> | 57.68  | 61.60 | 6.14  | 0.00 | 0.00 | 0.00 |
| W <sub>6</sub> S <sub>110</sub> | 51.89  | 56.44 | 0.47  | 0.00 | 0.00 | 0.00 |

## 5 Structural motifs

PES for  $[\text{NO}_2(\text{H}_2\text{O})_x]^-$

### 5.1 $x = 1$

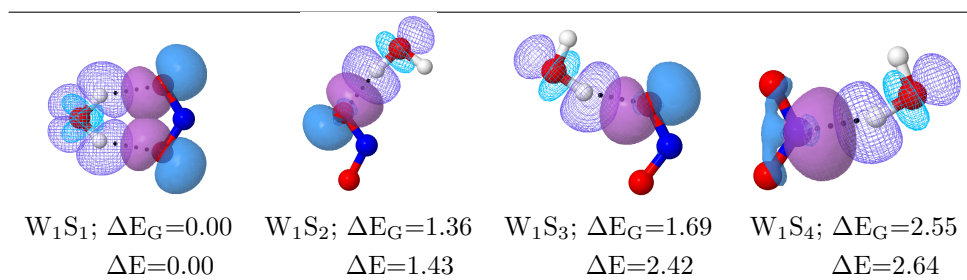

Figure S2: Structural motifs on the potential energy surface for  $[\text{NO}_2(\text{H}_2\text{O})]^-$ . Dotted lines correspond to intermolecular contacts, those for which AIM predicts bonding paths. Data taken from the B3LYP/6-311++G(*d,p*) optimized geometries.

## 5.2 $x = 2$

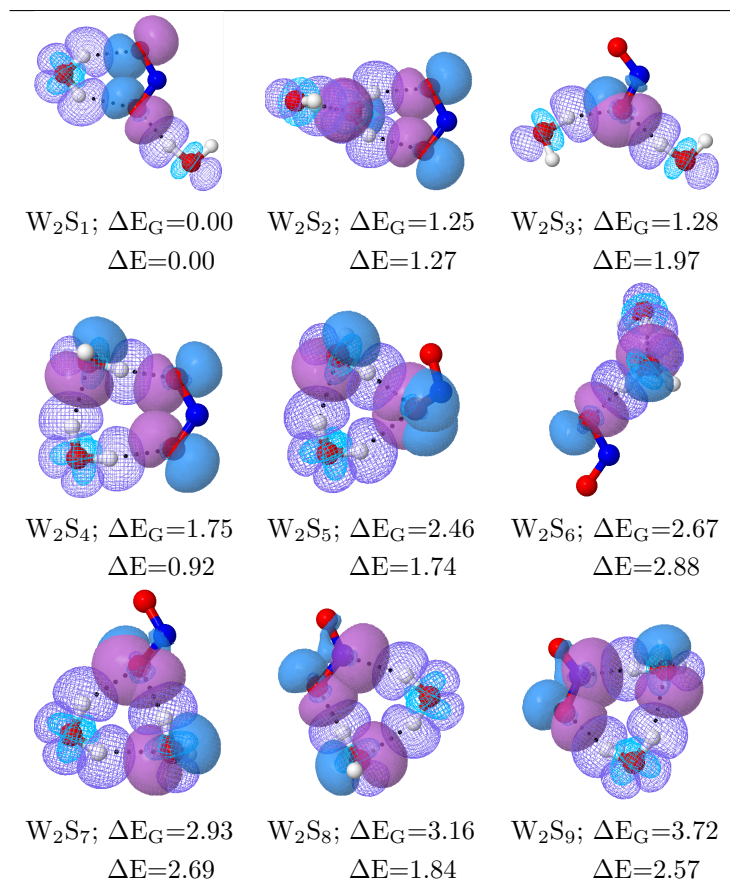

Figure S3: Structural motifs on the potential energy surface for  $[\text{NO}_2(\text{H}_2\text{O})_2]^-$ . Dotted lines correspond to intermolecular contacts, those for which AIM predicts bonding paths. Data taken from the B3LYP/6-311++G( $d,p$ ) optimized geometries.

### 5.3 $x = 3$

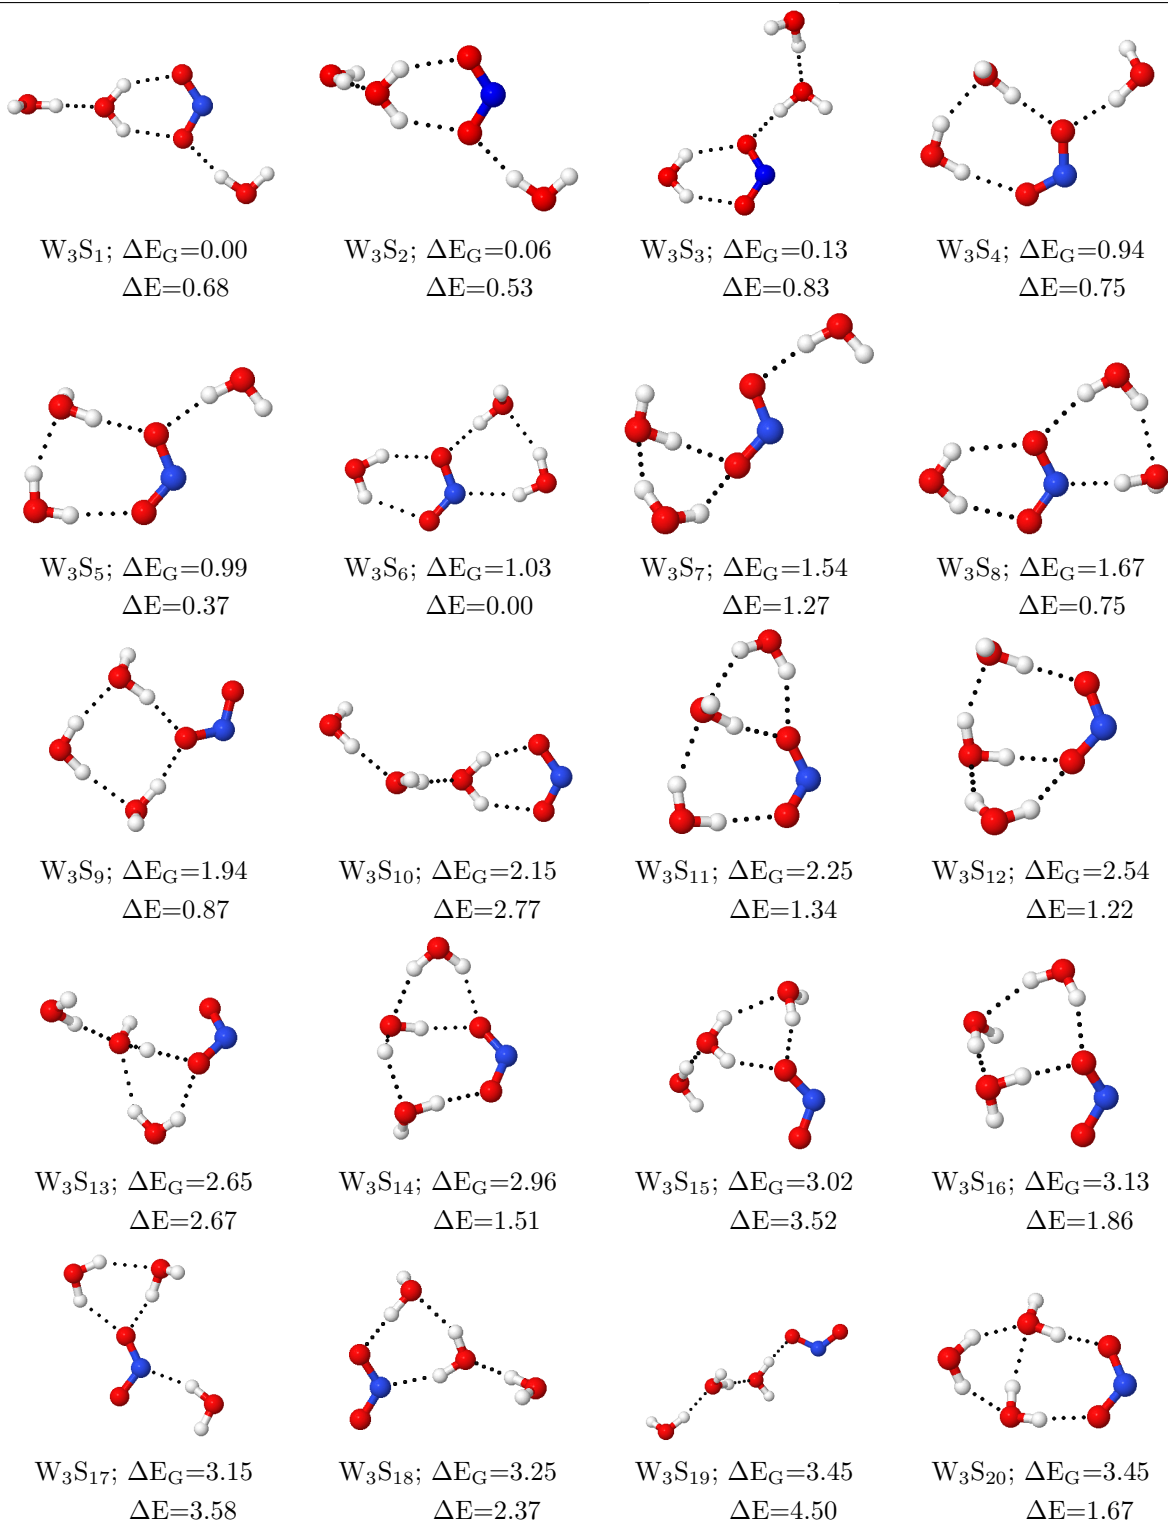

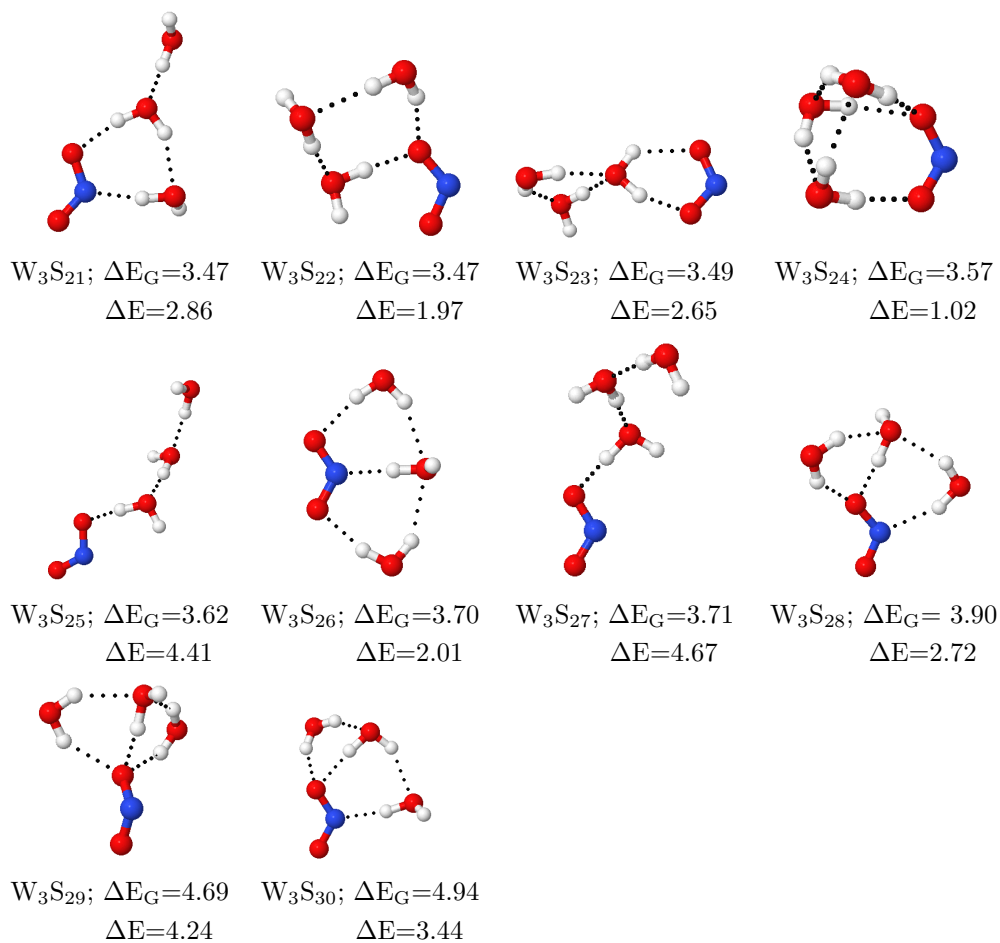

Figure S4: Structural motifs on the potential energy surface for  $[\text{NO}_2(\text{H}_2\text{O})_3]^-$ . Dotted lines correspond to intermolecular contacts, those for which AIM predicts bonding paths. Data taken from the B3LYP/6-311++G(*d,p*) optimized geometries.

## 5.4 $x = 4$

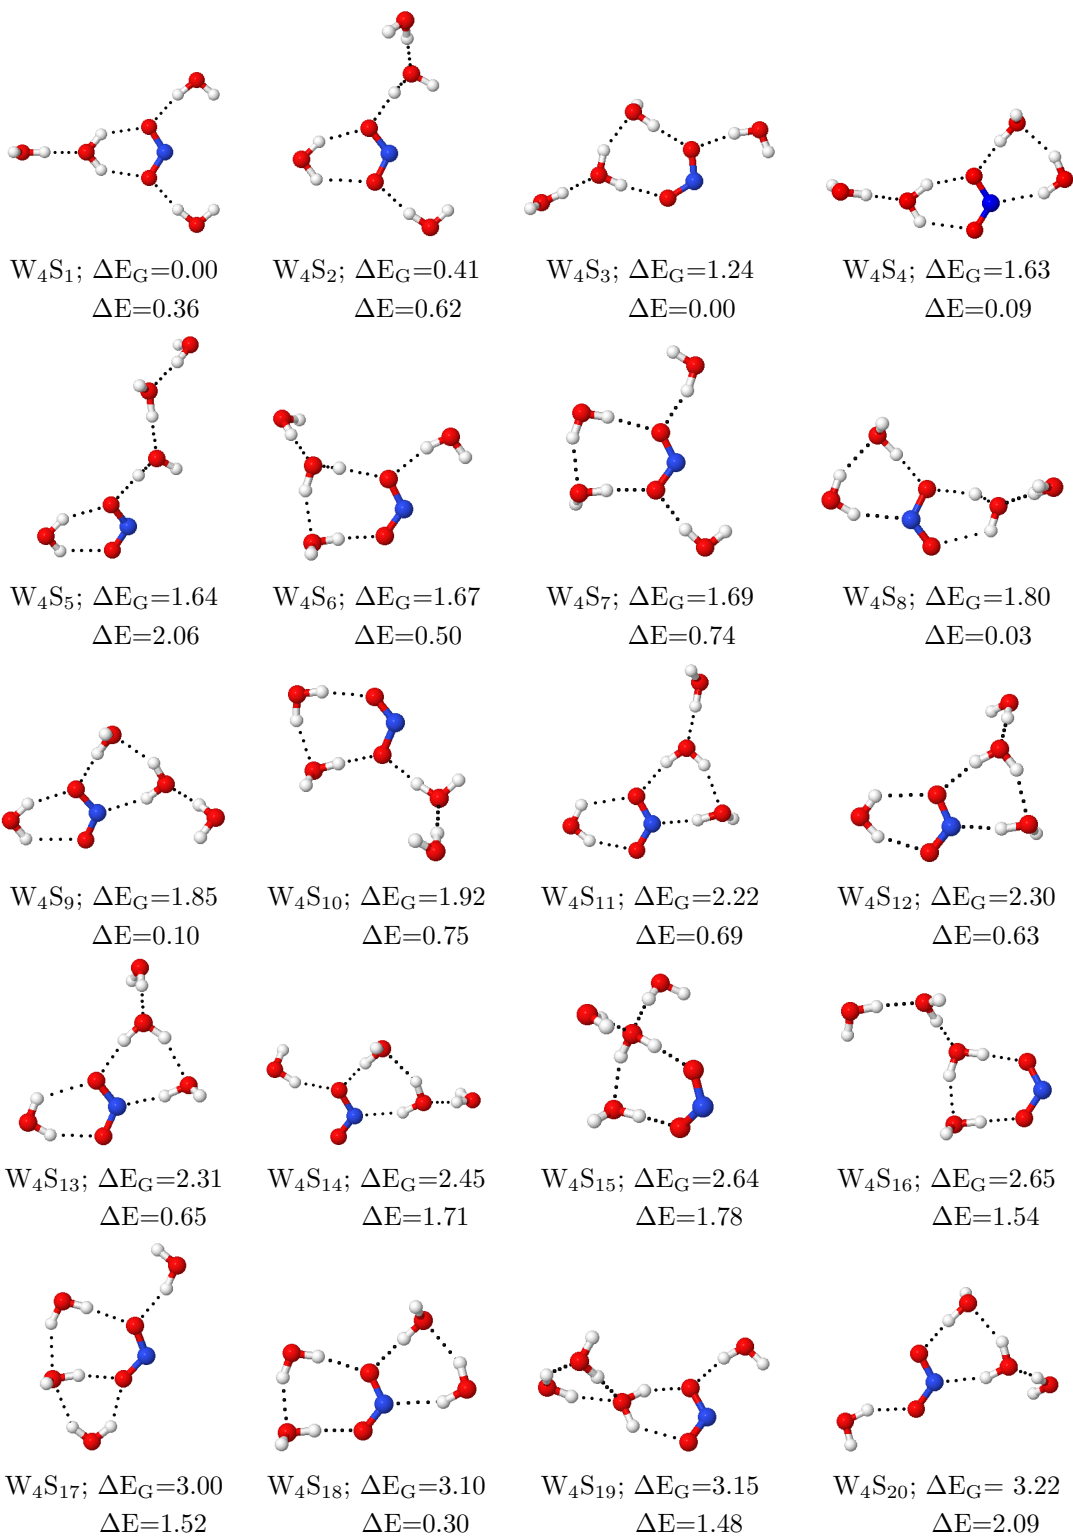

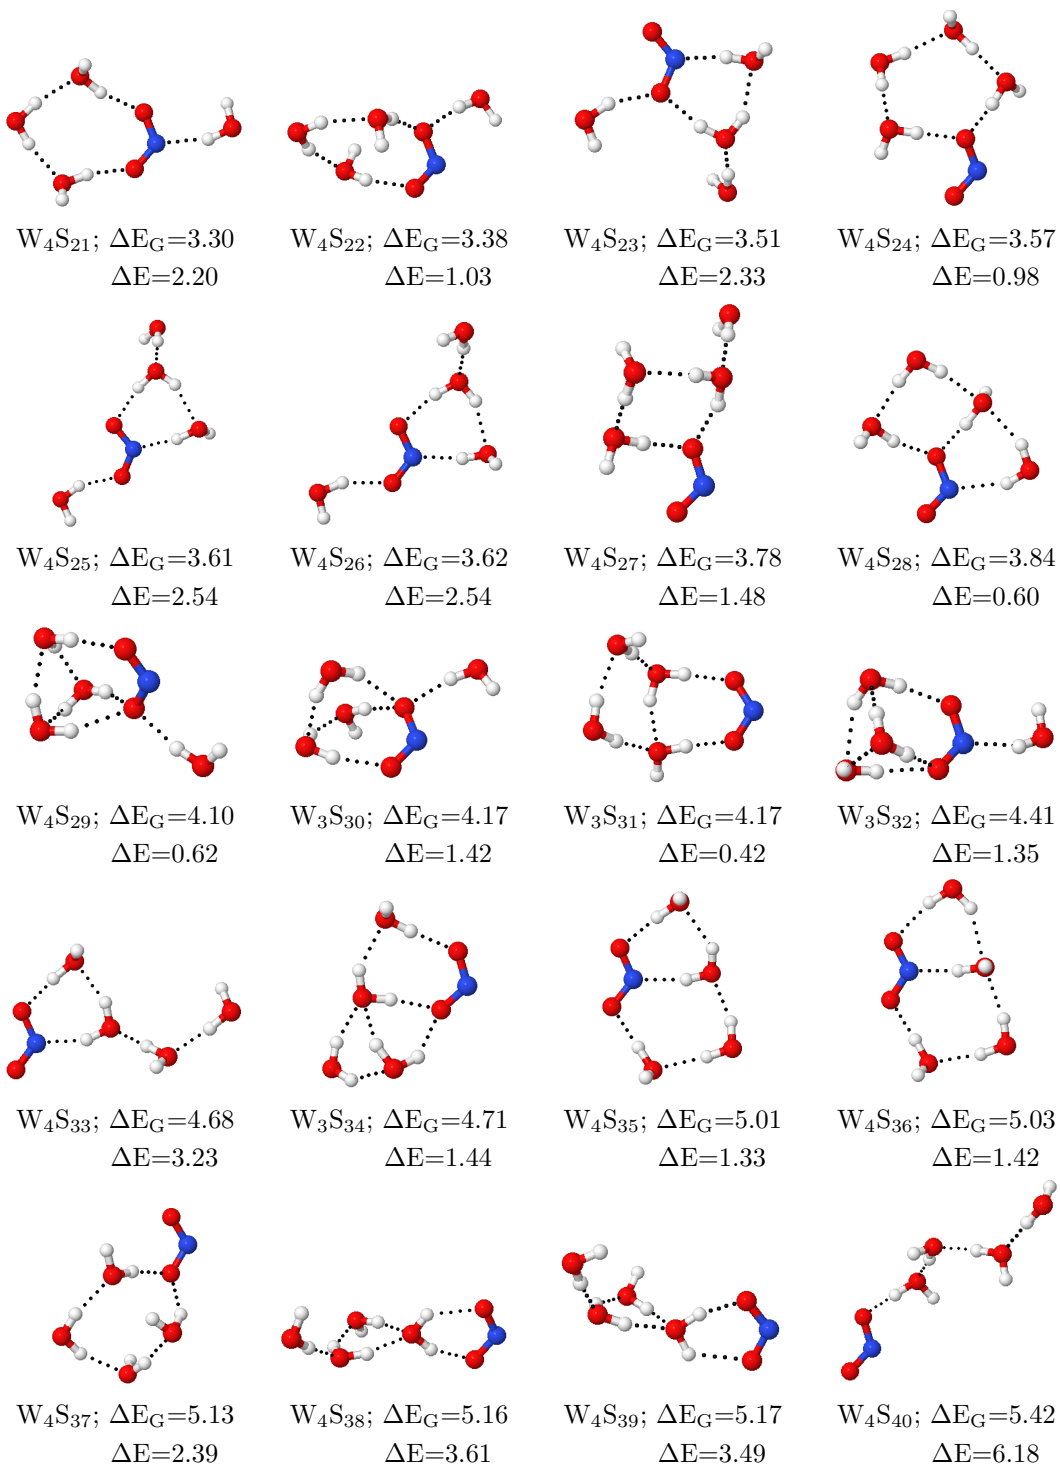

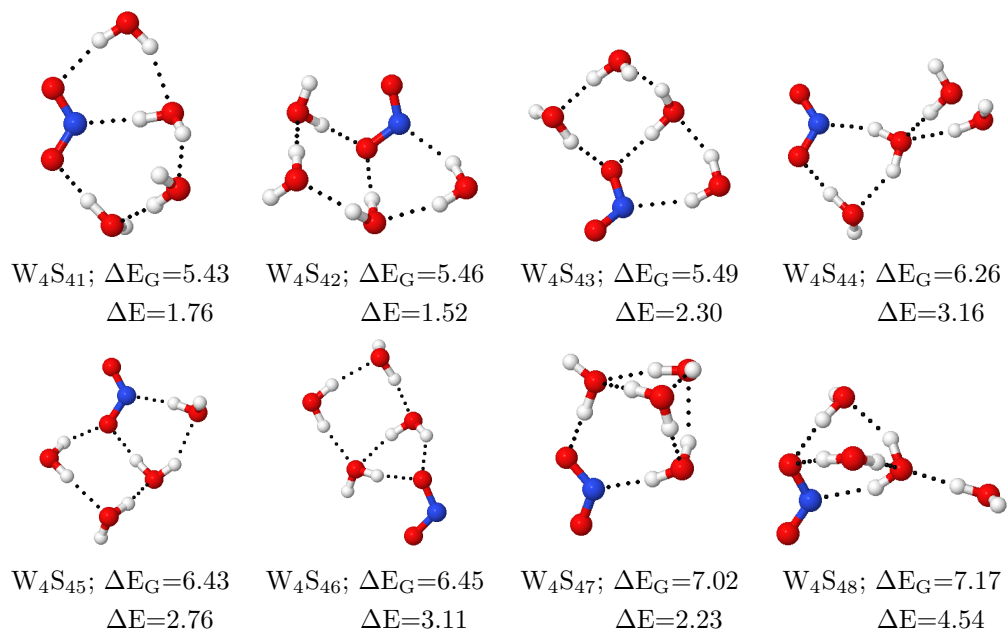

Figure S5: Structural motifs on the potential energy surface for  $[\text{NO}_2(\text{H}_2\text{O})_4]^-$ . Dotted lines correspond to intermolecular contacts, those for which AIM predicts bonding paths. Data taken from the B3LYP/6-311++G(*d,p*) optimized geometries.



## 5.5 $x = 5$

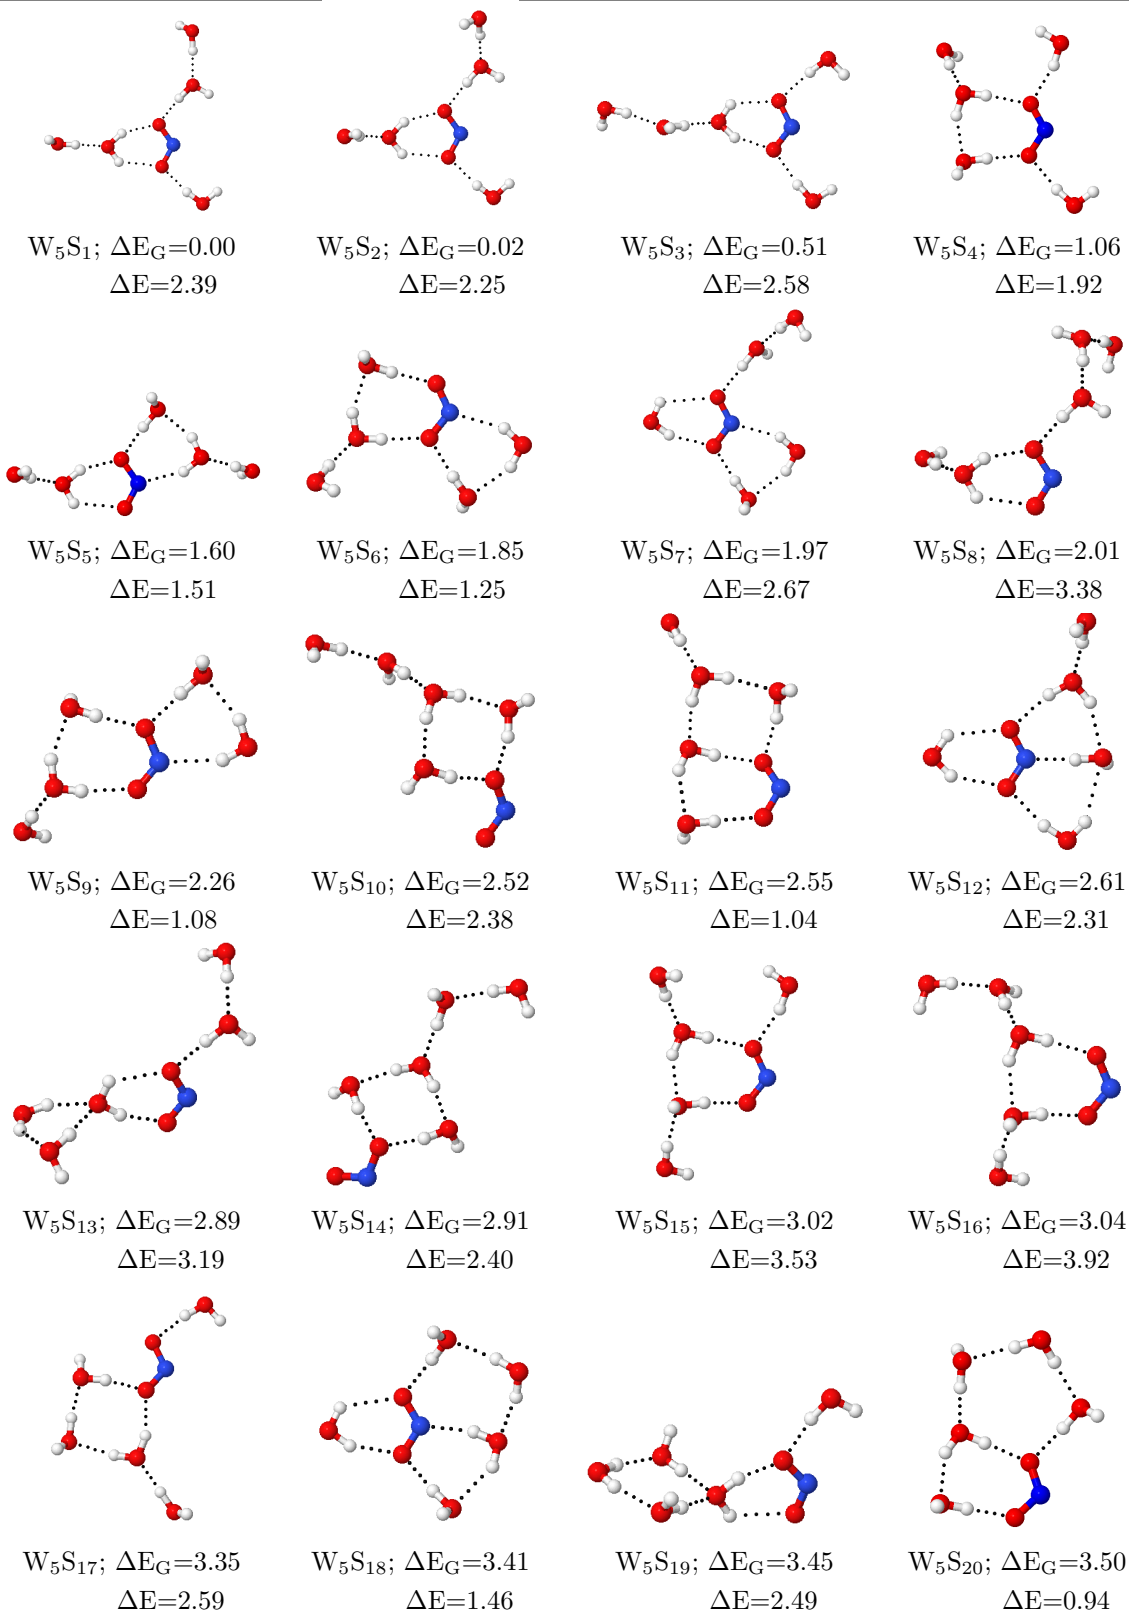

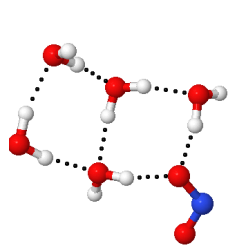

$W_5S_{21}$ ;  $\Delta E_G=3.57$   
 $\Delta E=2.47$

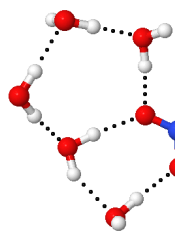

$W_5S_{22}$ ;  $\Delta E_G=3.69$   
 $\Delta E=1.73$

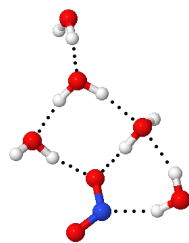

$W_5S_{23}$ ;  $\Delta E_G=3.69$   
 $\Delta E=1.92$

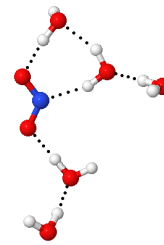

$W_5S_{24}$ ;  $\Delta E_G=3.70$   
 $\Delta E=3.83$

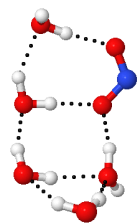

$W_5S_{25}$ ;  $\Delta E_G=3.90$   
 $\Delta E=1.91$

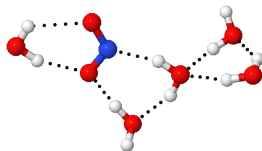

$W_5S_{26}$ ;  $\Delta E_G=3.93$   
 $\Delta E=2.47$

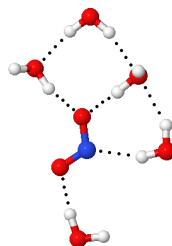

$W_5S_{27}$ ;  $\Delta E_G=4.04$   
 $\Delta E=2.87$

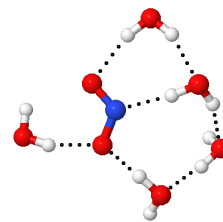

$W_5S_{28}$ ;  $\Delta E_G=4.08$   
 $\Delta E=2.07$

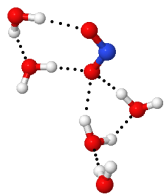

$W_5S_{29}$ ;  $\Delta E_G=4.27$   
 $\Delta E=4.05$

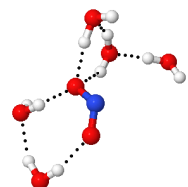

$W_5S_{30}$ ;  $\Delta E_G=4.31$   
 $\Delta E=1.32$

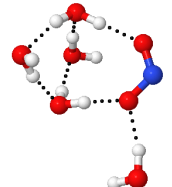

$W_5S_{31}$ ;  $\Delta E_G=4.34$   
 $\Delta E=2.02$

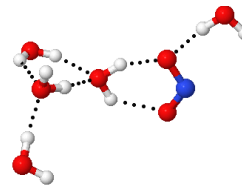

$W_5S_{32}$ ;  $\Delta E_G=4.34$   
 $\Delta E=4.65$

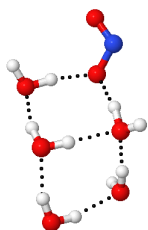

$W_5S_{33}$ ;  $\Delta E_G=4.34$   
 $\Delta E=1.91$

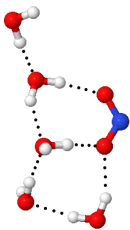

$W_5S_{34}$ ;  $\Delta E_G=4.39$   
 $\Delta E=2.82$

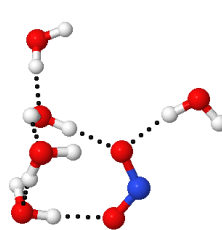

$W_5S_{35}$ ;  $\Delta E_G=4.47$   
 $\Delta E=2.91$

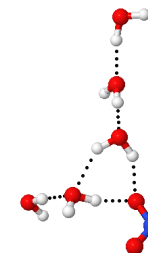

$W_5S_{36}$ ;  $\Delta E_G=4.72$   
 $\Delta E=5.85$

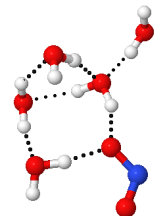

$W_5S_{37}$ ;  $\Delta E_G=4.78$   
 $\Delta E=3.61$

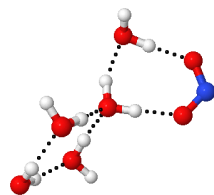

$W_5S_{38}$ ;  $\Delta E_G=4.79$   
 $\Delta E=2.68$

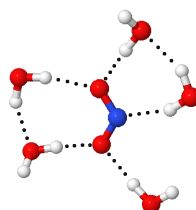

$W_5S_{39}$ ;  $\Delta E_G=4.81$   
 $\Delta E=2.87$

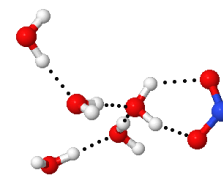

$W_5S_{40}$ ;  $\Delta E_G=4.85$   
 $\Delta E=6.51$

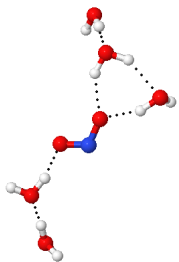

$W_5S_{41}$ ;  $\Delta E_G=5.03$   
 $\Delta E=5.39$

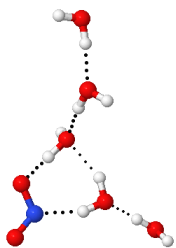

$W_5S_{42}$ ;  $\Delta E_G=5.04$   
 $\Delta E=5.50$

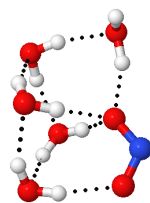

$W_5S_{43}$ ;  $\Delta E_G=5.12$   
 $\Delta E=0.00$

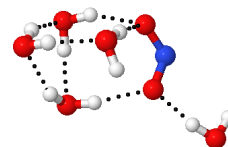

$W_5S_{44}$ ;  $\Delta E_G=5.23$   
 $\Delta E=1.87$

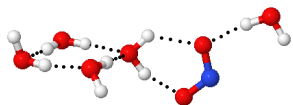

$W_5S_{45}$ ;  $\Delta E_G=5.23$   
 $\Delta E=3.78$

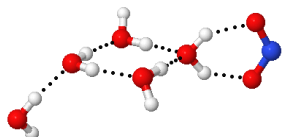

$W_5S_{46}$ ;  $\Delta E_G=5.30$   
 $\Delta E=3.95$

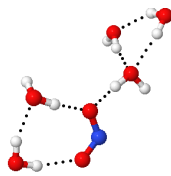

$W_5S_{47}$ ;  $\Delta E_G=5.68$   
 $\Delta E=4.20$

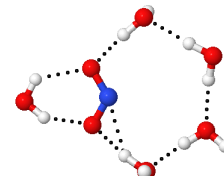

$W_5S_{48}$ ;  $\Delta E_G=5.72$   
 $\Delta E=14.72$

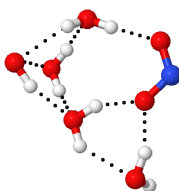

$W_5S_{49}$ ;  $\Delta E_G=5.99$   
 $\Delta E=2.70$

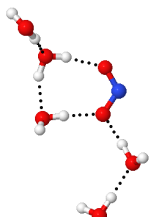

$W_5S_{50}$ ;  $\Delta E_G=6.00$   
 $\Delta E=3.83$

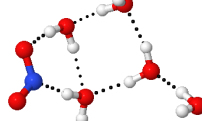

$W_5S_{51}$ ;  $\Delta E_G=6.04$   
 $\Delta E=3.70$

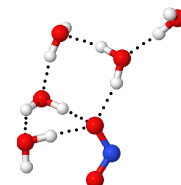

$W_5S_{52}$ ;  $\Delta E_G=6.07$   
 $\Delta E=4.00$

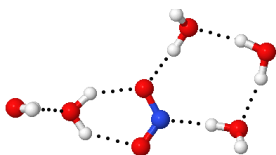

$W_5S_{53}$ ;  $\Delta E_G=6.17$   
 $\Delta E=3.10$

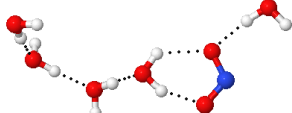

$W_5S_{54}$ ;  $\Delta E_G=6.52$   
 $\Delta E=5.49$

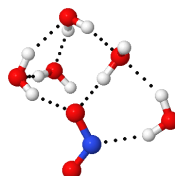

$W_5S_{55}$ ;  $\Delta E_G=6.64$   
 $\Delta E=3.46$

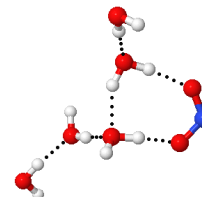

$W_5S_{56}$ ;  $\Delta E_G=6.67$   
 $\Delta E=5.00$

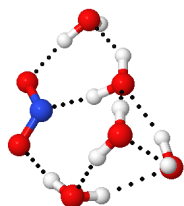

$W_5S_{57}$ ;  $\Delta E_G=6.71$   
 $\Delta E=2.04$

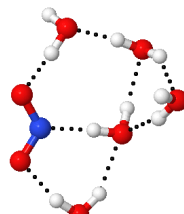

$W_5S_{58}$ ;  $\Delta E_G=6.91$   
 $\Delta E=3.38$

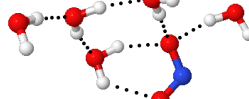

$W_5S_{59}$ ;  $\Delta E_G=7.04$   
 $\Delta E=5.54$

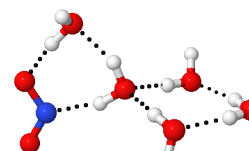

$W_5S_{60}$ ;  $\Delta E_G=7.12$   
 $\Delta E=4.45$

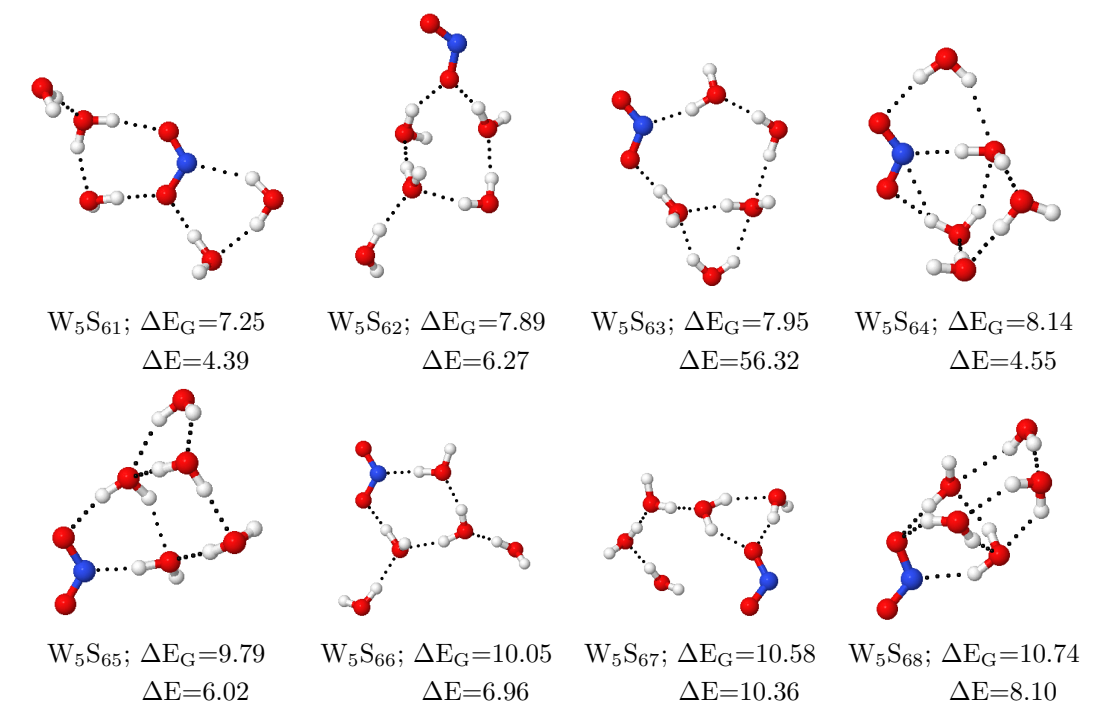

Figure S6: Structural motifs on the potential energy surface for  $[\text{NO}_2(\text{H}_2\text{O})_5]^-$ . Dotted lines correspond to intermolecular contacts, those for which AIM predicts bonding paths. Data taken from the B3LYP/6-311++G(*d,p*) optimized geometries.

## 5.6 $x = 6$

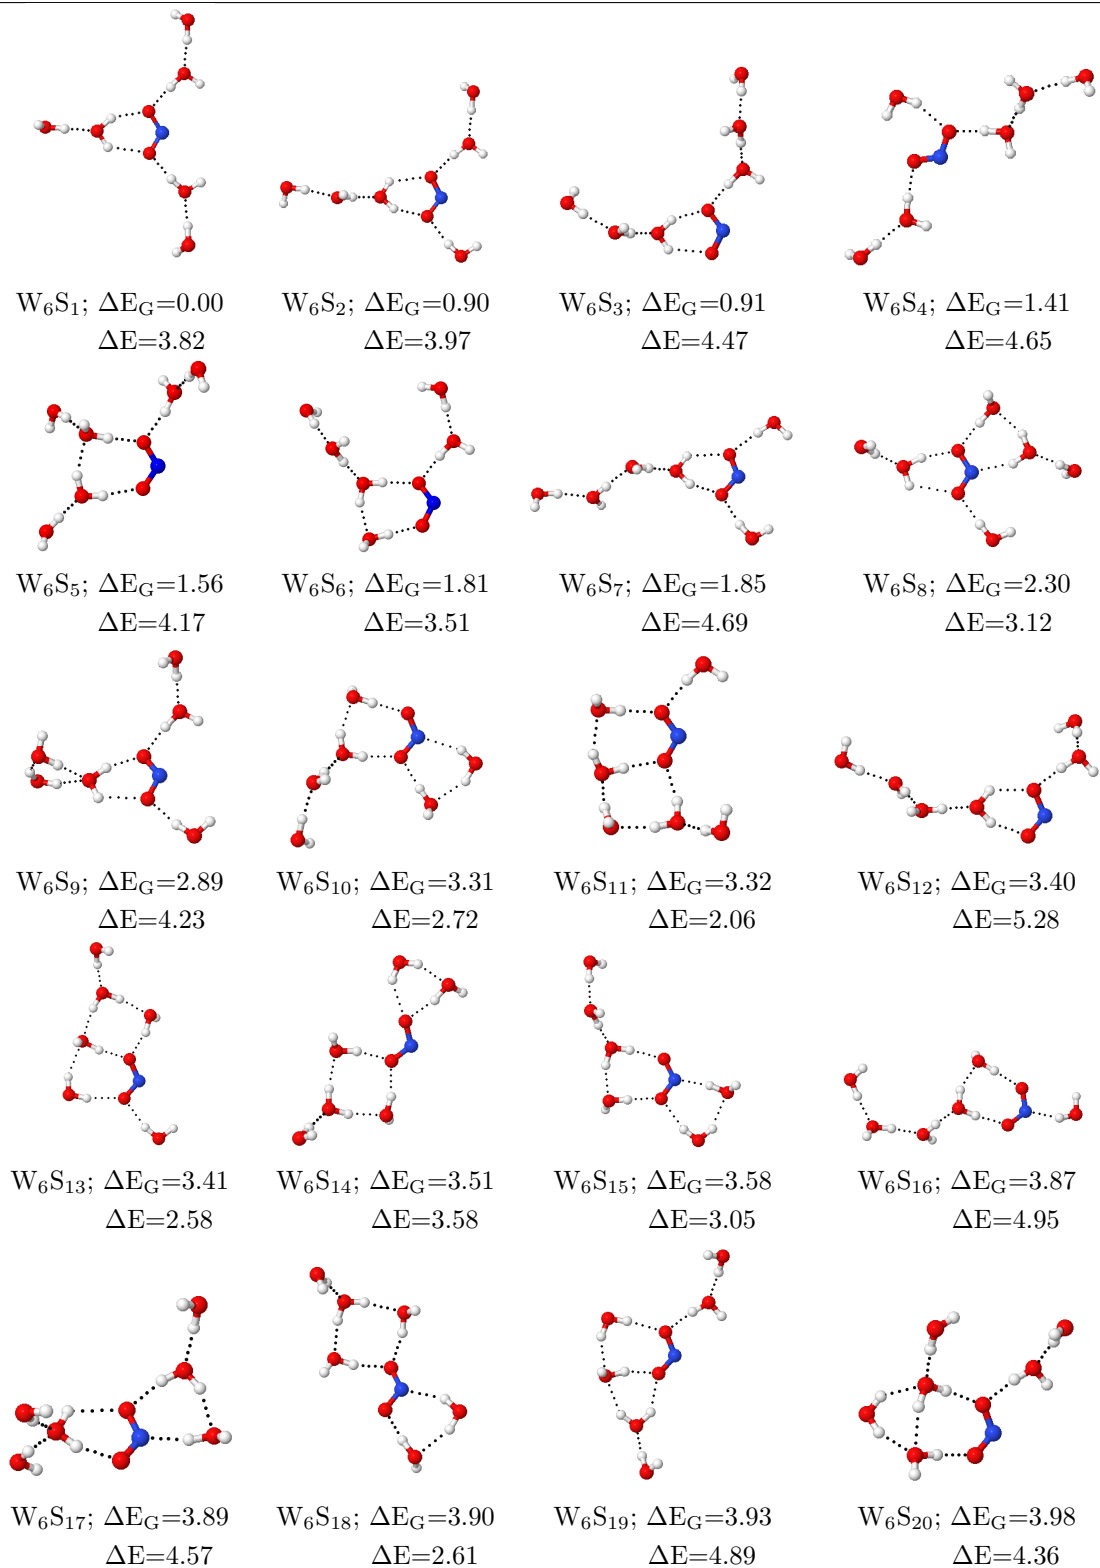

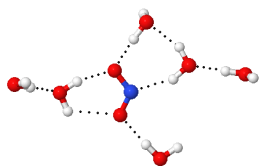

W<sub>6</sub>S<sub>21</sub>;  $\Delta E_G=3.98$   
 $\Delta E=3.45$

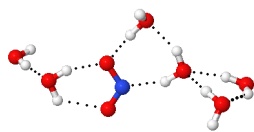

W<sub>6</sub>S<sub>22</sub>;  $\Delta E_G=4.05$   
 $\Delta E=3.23$

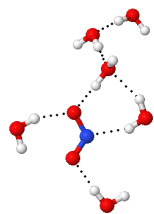

W<sub>6</sub>S<sub>23</sub>;  $\Delta E_G=4.08$   
 $\Delta E=4.94$

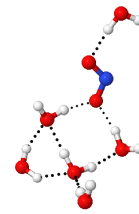

W<sub>6</sub>S<sub>24</sub>;  $\Delta E_G=4.16$   
 $\Delta E=3.43$

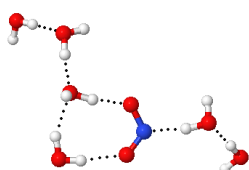

W<sub>6</sub>S<sub>25</sub>;  $\Delta E_G=4.20$   
 $\Delta E=6.15$

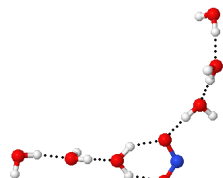

W<sub>6</sub>S<sub>26</sub>;  $\Delta E_G=4.35$   
 $\Delta E=5.12$

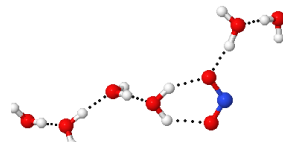

W<sub>6</sub>S<sub>27</sub>;  $\Delta E_G=4.59$   
 $\Delta E=5.73$

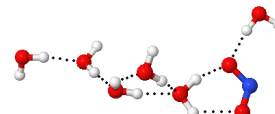

W<sub>6</sub>S<sub>28</sub>;  $\Delta E_G=4.60$   
 $\Delta E=5.61$

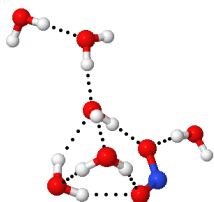

W<sub>6</sub>S<sub>29</sub>;  $\Delta E_G=4.61$   
 $\Delta E=4.11$

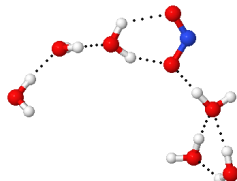

W<sub>6</sub>S<sub>30</sub>;  $\Delta E_G=4.69$   
 $\Delta E=5.38$

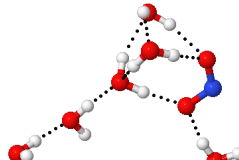

W<sub>6</sub>S<sub>31</sub>;  $\Delta E_G=4.78$   
 $\Delta E=4.14$

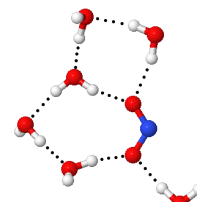

W<sub>6</sub>S<sub>32</sub>;  $\Delta E_G=4.79$   
 $\Delta E=3.15$

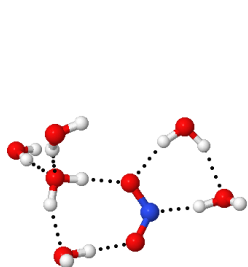

W<sub>6</sub>S<sub>33</sub>;  $\Delta E_G=4.86$   
 $\Delta E=4.41$

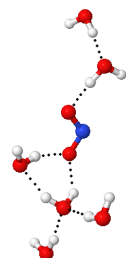

W<sub>6</sub>S<sub>34</sub>;  $\Delta E_G=4.89$   
 $\Delta E=6.42$

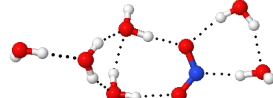

W<sub>6</sub>S<sub>35</sub>;  $\Delta E_G=4.96$   
 $\Delta E=3.53$

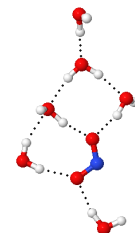

W<sub>6</sub>S<sub>36</sub>;  $\Delta E_G=5.00$   
 $\Delta E=2.90$

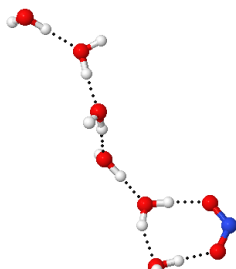

W<sub>6</sub>S<sub>37</sub>;  $\Delta E_G=5.07$   
 $\Delta E=6.66$

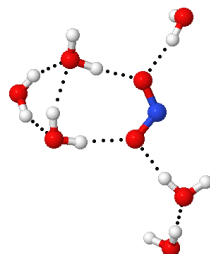

W<sub>6</sub>S<sub>38</sub>;  $\Delta E_G=5.11$   
 $\Delta E=4.49$

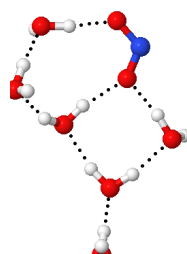

W<sub>6</sub>S<sub>39</sub>;  $\Delta E_G=5.14$   
 $\Delta E=2.31$

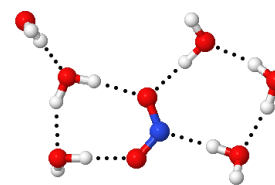

W<sub>6</sub>S<sub>40</sub>;  $\Delta E_G=5.17$   
 $\Delta E=3.14$

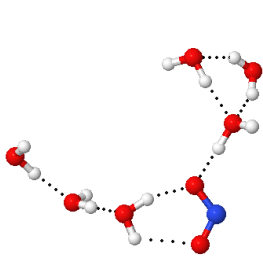

W<sub>6</sub>S<sub>41</sub>;  $\Delta E_G=5.21$   
 $\Delta E=5.22$

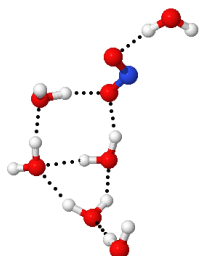

W<sub>6</sub>S<sub>42</sub>;  $\Delta E_G=5.21$   
 $\Delta E=4.20$

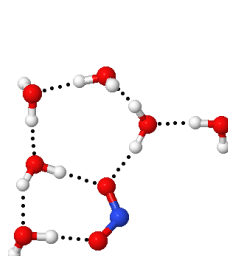

W<sub>6</sub>S<sub>43</sub>;  $\Delta E_G=5.21$   
 $\Delta E=2.88$

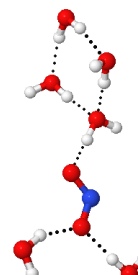

W<sub>6</sub>S<sub>44</sub>;  $\Delta E_G=5.35$   
 $\Delta E=5.75$

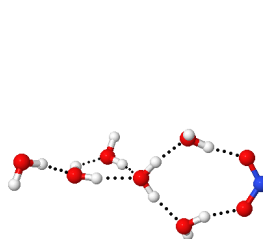

W<sub>6</sub>S<sub>45</sub>;  $\Delta E_G=5.38$   
 $\Delta E=4.58$

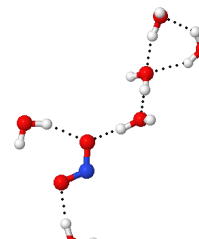

W<sub>6</sub>S<sub>46</sub>;  $\Delta E_G=5.38$   
 $\Delta E=6.67$

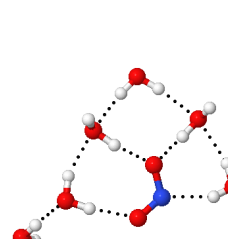

W<sub>6</sub>S<sub>47</sub>;  $\Delta E_G=5.40$   
 $\Delta E=2.93$

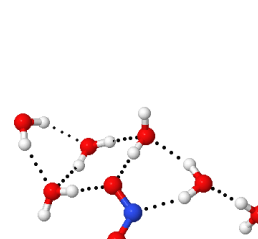

W<sub>6</sub>S<sub>48</sub>;  $\Delta E_G=5.41$   
 $\Delta E=3.13$

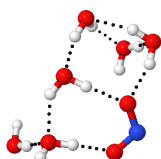

W<sub>6</sub>S<sub>49</sub>;  $\Delta E_G=5.62$   
 $\Delta E=3.59$

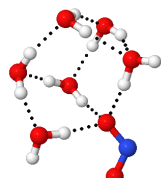

W<sub>6</sub>S<sub>50</sub>;  $\Delta E_G=5.63$   
 $\Delta E=0.00$

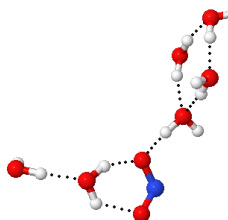

W<sub>6</sub>S<sub>51</sub>;  $\Delta E_G=5.65$   
 $\Delta E=4.82$

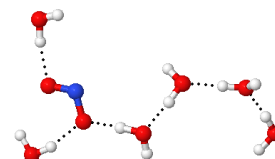

W<sub>6</sub>S<sub>52</sub>;  $\Delta E_G=5.71$   
 $\Delta E=6.50$

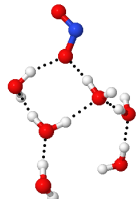

W<sub>6</sub>S<sub>53</sub>;  $\Delta E_G=5.77$   
 $\Delta E=6.18$

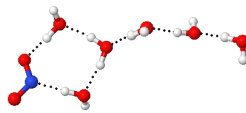

W<sub>6</sub>S<sub>54</sub>;  $\Delta E_G=5.87$   
 $\Delta E=5.81$

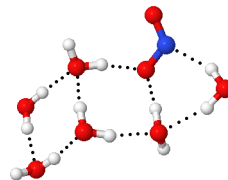

W<sub>6</sub>S<sub>55</sub>;  $\Delta E_G=5.87$   
 $\Delta E=2.30$

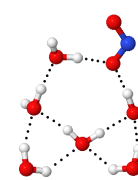

W<sub>6</sub>S<sub>56</sub>;  $\Delta E_G=6.05$   
 $\Delta E=4.17$

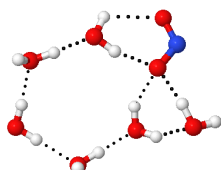

W<sub>6</sub>S<sub>57</sub>;  $\Delta E_G=6.13$   
 $\Delta E=4.26$

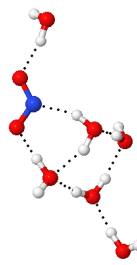

W<sub>6</sub>S<sub>58</sub>;  $\Delta E_G=6.23$   
 $\Delta E=4.51$

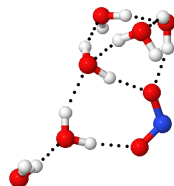

W<sub>6</sub>S<sub>59</sub>;  $\Delta E_G=6.24$   
 $\Delta E=3.20$

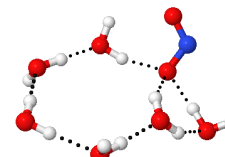

W<sub>6</sub>S<sub>60</sub>;  $\Delta E_G=6.32$   
 $\Delta E=4.23$

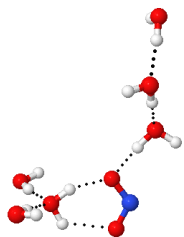

W<sub>6</sub>S<sub>61</sub>;  $\Delta E_G=6.35$   
 $\Delta E=6.14$

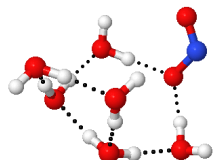

W<sub>6</sub>S<sub>62</sub>;  $\Delta E_G=6.43$   
 $\Delta E=2.59$

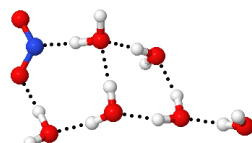

W<sub>6</sub>S<sub>63</sub>;  $\Delta E_G=6.43$   
 $\Delta E=4.07$

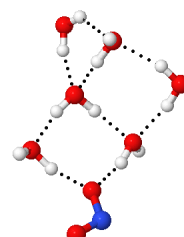

W<sub>6</sub>S<sub>64</sub>;  $\Delta E_G=6.56$   
 $\Delta E=3.45$

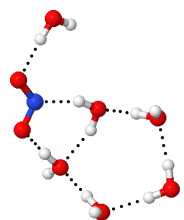

W<sub>6</sub>S<sub>65</sub>;  $\Delta E_G=6.61$   
 $\Delta E=4.60$

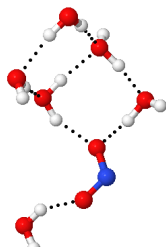

W<sub>6</sub>S<sub>66</sub>;  $\Delta E_G=6.67$   
 $\Delta E=5.25$

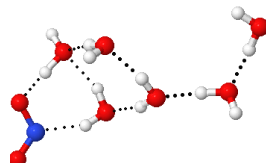

W<sub>6</sub>S<sub>67</sub>;  $\Delta E_G=6.71$   
 $\Delta E=4.96$

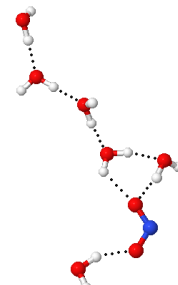

W<sub>6</sub>S<sub>68</sub>;  $\Delta E_G=6.94$   
 $\Delta E=9.24$

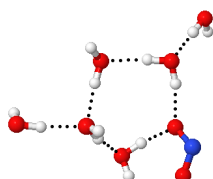

W<sub>6</sub>S<sub>69</sub>;  $\Delta E_G=7.01$   
 $\Delta E=6.89$

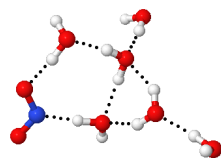

W<sub>6</sub>S<sub>70</sub>;  $\Delta E_G=7.01$   
 $\Delta E=5.77$

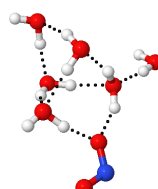

W<sub>6</sub>S<sub>71</sub>;  $\Delta E_G=7.02$   
 $\Delta E=3.73$

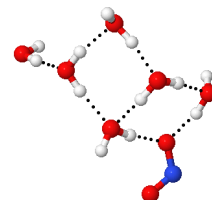

W<sub>6</sub>S<sub>72</sub>;  $\Delta E_G=7.08$   
 $\Delta E=2.69$

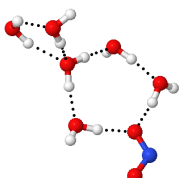

W<sub>6</sub>S<sub>73</sub>;  $\Delta E_G=7.11$   
 $\Delta E=4.00$

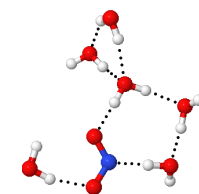

W<sub>6</sub>S<sub>74</sub>;  $\Delta E_G=7.13$   
 $\Delta E=4.34$

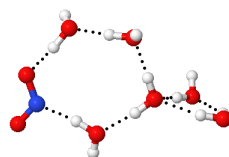

W<sub>6</sub>S<sub>75</sub>;  $\Delta E_G=7.20$   
 $\Delta E=5.30$

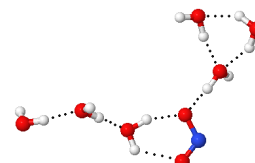

W<sub>6</sub>S<sub>76</sub>;  $\Delta E_G=7.22$   
 $\Delta E=5.82$

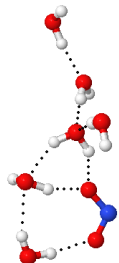

W<sub>6</sub>S<sub>77</sub>;  $\Delta E_G=7.24$   
 $\Delta E=7.61$

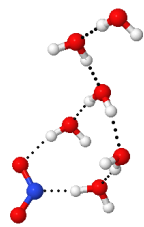

W<sub>6</sub>S<sub>78</sub>;  $\Delta E_G=7.28$   
 $\Delta E=5.87$

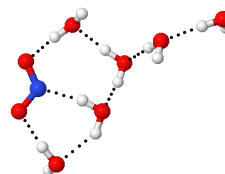

W<sub>6</sub>S<sub>79</sub>;  $\Delta E_G=7.33$   
 $\Delta E=4.23$

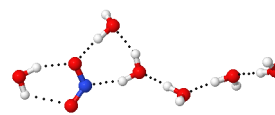

W<sub>6</sub>S<sub>80</sub>;  $\Delta E_G=7.35$   
 $\Delta E=5.33$



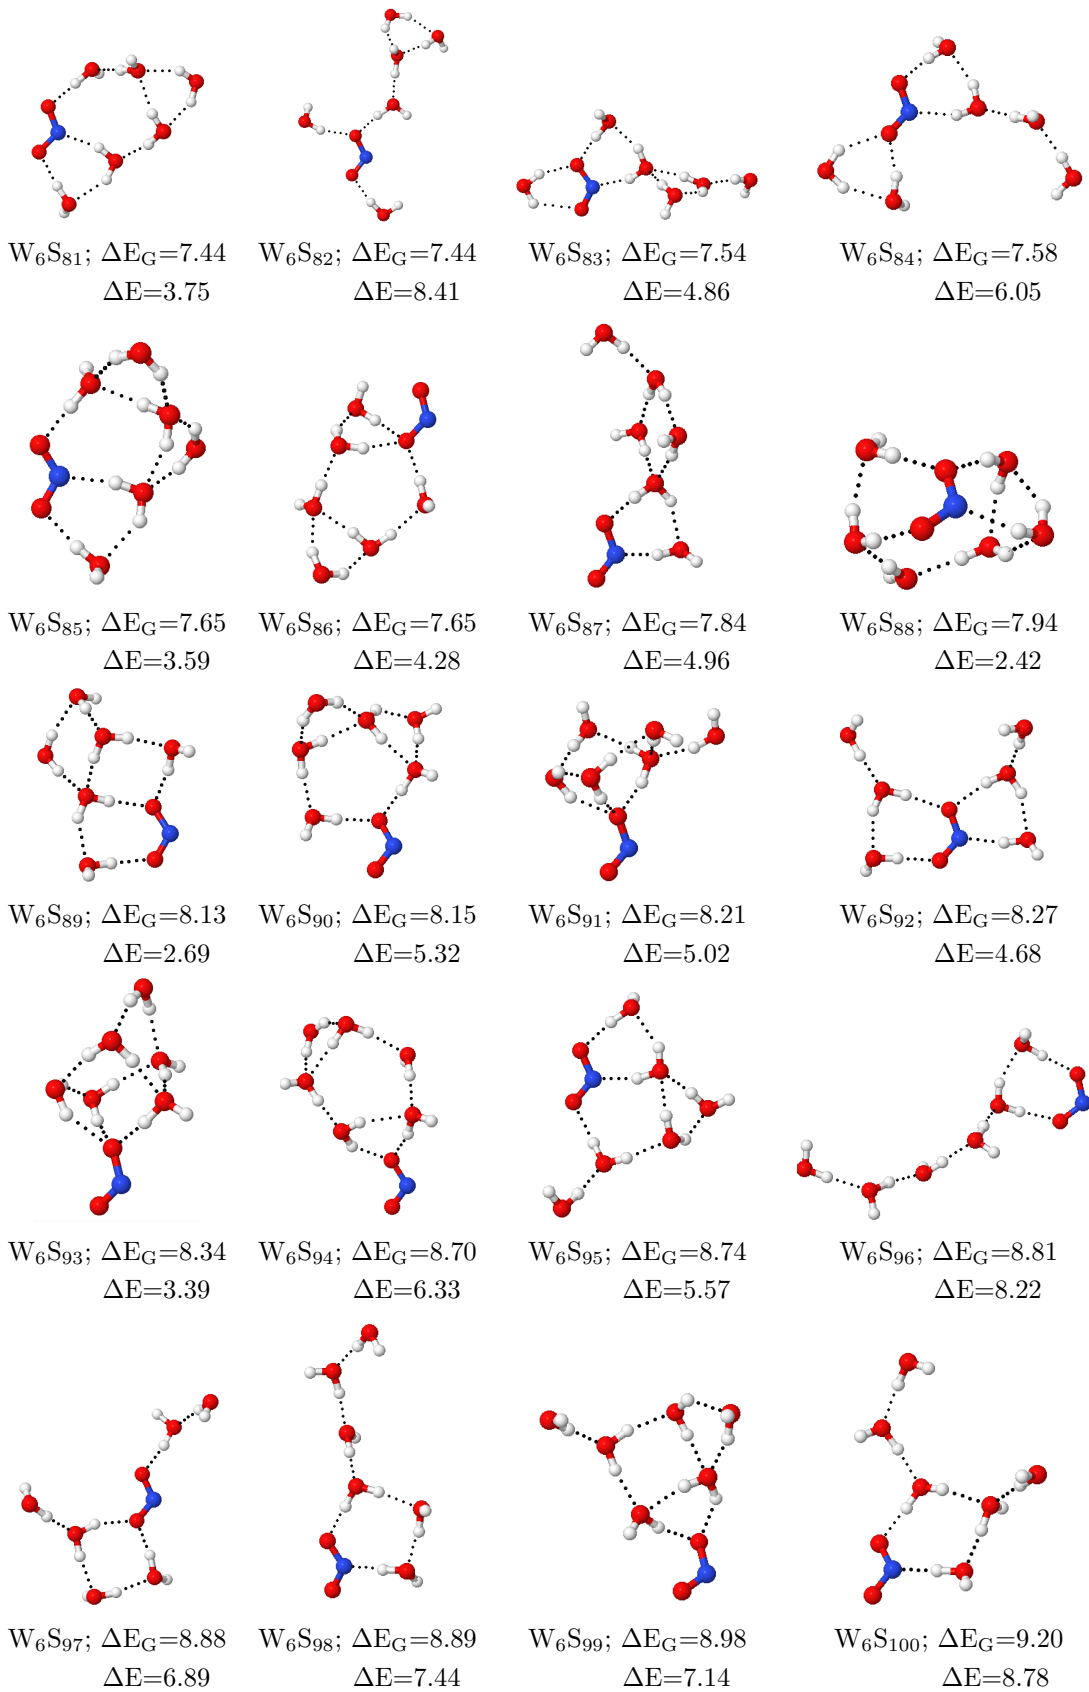

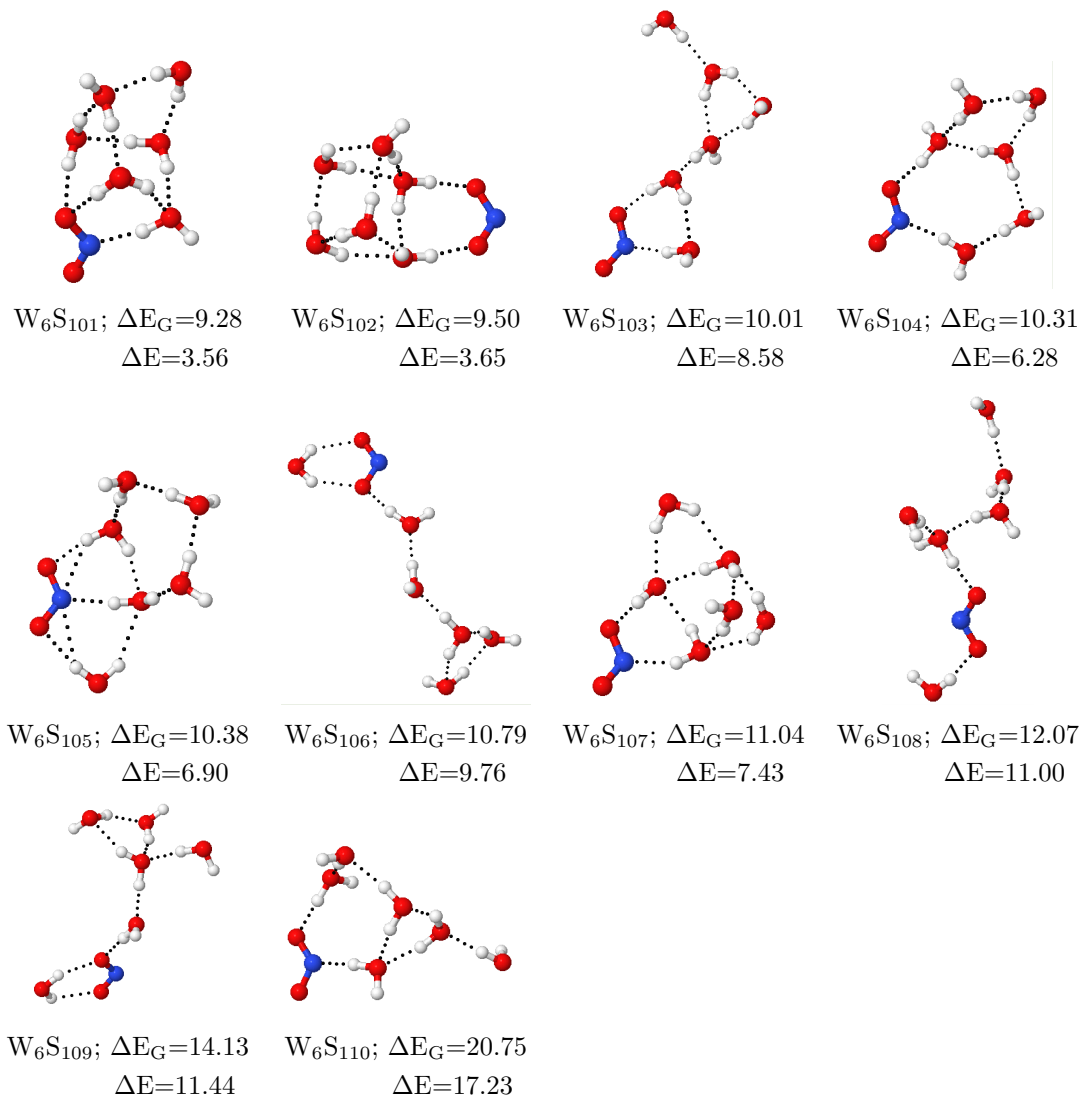

Figure S7: Structural motifs on the potential energy surface for  $[\text{NO}_2(\text{H}_2\text{O})_6]^-$ . Dotted lines correspond to intermolecular contacts, those for which AIM predicts bonding paths. Data taken from the B3LYP/6-311++G(*d,p*) optimized geometries.

## 6 Vertical Excitation Energies in the QM/MM approaches

Table S4: Calculated spectral features for solvated  $\text{NO}_2^-$  using the B3LYP/6-311++G( $d,p$ ) model chemistry and two different charge models in the MD runs. Experimental  $\lambda_{max} = 353.9$  (weak),  $\lambda_{max} = 212.8$  nm (intense) as reported by Thomas and Brogat[10] for 10.6 and 3007 mg/L, respectively.

| QM/MM approach | CM5 charges           |                         | RESP charges          |                         |
|----------------|-----------------------|-------------------------|-----------------------|-------------------------|
|                | $n \rightarrow \pi^*$ | $\pi \rightarrow \pi^*$ | $n \rightarrow \pi^*$ | $\pi \rightarrow \pi^*$ |
| QM/FQ (Rick)   | 336.13                | 179.86                  | 337.27                | 180.51                  |
| QM/FQc         | 335.46                | 176.58                  | 338.07                | 177.12                  |
| QM/FQc+rep     | 347.10                | 167.62                  | 347.95                | 167.67                  |
| FQF $\mu$      | 335.57                | 178.28                  | 337.72                | 178.70                  |
| FQF $\mu$ +rep | 347.22                | 169.00                  | 347.71                | 169.03                  |

## 7 CAM-B3LYP spectra

Table S5: Calculated spectral features for solvated  $\text{NO}_2^-$  using the CAM-B3LYP/6-311++G( $d,p$ ) model chemistry. Experimental  $\lambda_{max} = 353.9$  (weak),  $\lambda_{max} = 212.8$  nm (intense) as reported by Thomas and Brogat[10] for 10.6 and 3007 mg/L, respectively.  $x$ , the number water molecules in direct contact with  $\text{NO}_2^-$  is included

| Sampling                 | Solvation model   | $x$ | CAM-B3LYP                                  |                                              | mg $\text{NO}_2^-$ /L sln |
|--------------------------|-------------------|-----|--------------------------------------------|----------------------------------------------|---------------------------|
|                          |                   |     | $n \rightarrow \pi^*$<br>$\lambda_{max,1}$ | $\pi \rightarrow \pi^*$<br>$\lambda_{max,2}$ |                           |
| Isolated $\text{NO}_2^-$ | PCM               |     | 364.03                                     | 190.51                                       |                           |
| ASCEC                    | Gas phase cluster | 1   | 370.49                                     | 242.45                                       |                           |
|                          |                   | 2   | 365.59                                     | 220.95                                       |                           |
|                          |                   | 3   | 363.14                                     | 221.70                                       |                           |
|                          |                   | 4   | 355.78                                     | 206.11                                       |                           |
|                          |                   | 5   | 353.95                                     | 203.00                                       |                           |
|                          |                   | 6   | 353.99                                     | 184.01                                       |                           |
| ASCEC                    | Cluster + PCM     | 1   | 372.33                                     | 205.35                                       | 2.54                      |
|                          |                   | 2   | 366.81                                     | 189.88                                       | 1.27                      |
|                          |                   | 3   | 365.59                                     | 189.19                                       | 0.85                      |
|                          |                   | 4   | 358.85                                     | 187.03                                       | 0.64                      |
|                          |                   | 5   | 355.78                                     | 186.78                                       | 0.51                      |
|                          |                   | 6   | 357.01                                     | 186.09                                       | 0.42                      |

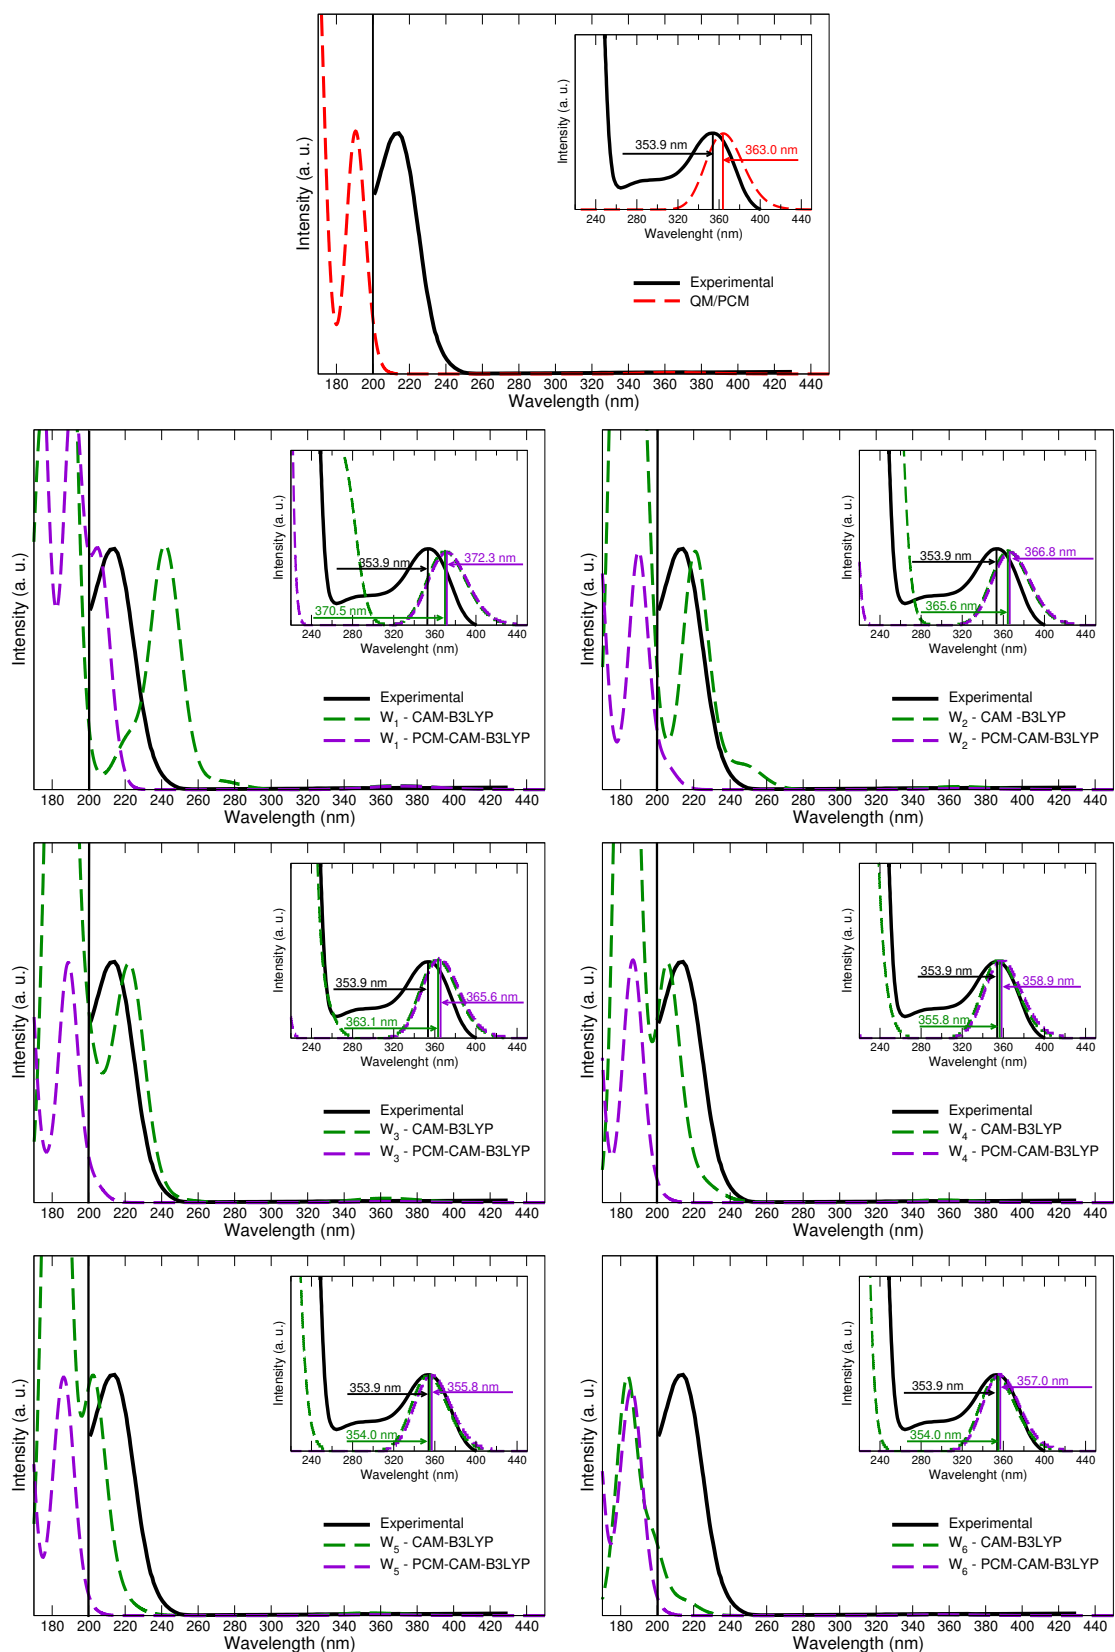

Figure S8: Experimental<sup>[10]</sup> (solid black line) and computed (dashed lines) spectra for aqueous nitrite at the CAM-B3LYP/6-311++G(*d,p*) level of theory. There is no experimental information to the left of the vertical solid lines. An inset showing the structure of the low intensity 353.9 nm band is also provided.

## References

- [1] M. J. Abraham, T. Murtola, R. Schulz, S. Páll, J. C. Smith, B. Hess, and E. Lindahl, “GROMACS: High performance molecular simulations through multi-level parallelism from laptops to supercomputers,” *SoftwareX*, vol. 1-2, pp. 19–25, 2015.
- [2] A. V. Marenich, S. V. Jerome, C. J. Cramer, and D. G. Truhlar, “Charge model 5: An extension of hirshfeld population analysis for the accurate description of molecular interactions in gaseous and condensed phases,” *J. Chem. Theory Comput.*, vol. 8, no. 2, pp. 527–541, 2012. PMID: 26596602.
- [3] C. I. Bayly, P. Cieplak, W. Cornell, and P. A. Kollman, “A well-behaved electrostatic potential based method using charge restraints for deriving atomic charges: the resp model,” *The Journal of Physical Chemistry*, vol. 97, no. 40, pp. 10269–10280, 1993.
- [4] J. Wang, R. M. Wolf, J. W. Caldwell, P. A. Kollman, and D. A. Case, “Development and testing of a general amber force field,” *J. Comput. Chem.*, vol. 25, no. 9, pp. 1157–1174, 2004.
- [5] P. Mark and L. Nilsson, “Structure and dynamics of the TIP3P, SPC, and SPC/E water models at 298 K,” *J. Phys. Chem. A*, vol. 105, no. 43, pp. 9954–9960, 2001.
- [6] G. Bussi, D. Donadio, and M. Parrinello, “Canonical sampling through velocity rescaling,” *J. Chem. Phys.*, vol. 126, no. 1, p. 014101, 2007.
- [7] M. Parrinello and A. Rahman, “Strain fluctuations and elastic constants,” *J. Chem. Phys.*, vol. 76, no. 5, pp. 2662–2666, 1982.
- [8] T. Darden, D. York, and L. Pedersen, “Particle mesh ewald: An nlog(n) method for ewald sums in large systems,” *J. Chem. Phys.*, vol. 98, no. 12, pp. 10089–10092, 1993.
- [9] H. J. Berendsen and W. F. Van Gunsteren, “Practical algorithms for dynamic simulations,” *Molecular-dynamics simulation of statistical-mechanical systems*, pp. 43–65, 1986.
- [10] O. Thomas and M. Brogat, “Chapter 12 - uv spectra library,” in *UV-Visible Spectrophotometry of Water and Wastewater (Second Edition)* (O. Thomas and C. Burgess, eds.), pp. 379 – 517, Elsevier, second edition ed., 2017.
